# Supplementary material for: Global state of the art of teaching life cycle assessment in higher education
Source: Springer Nature journal article supplement (doi:10.1007/s11367-024-02319-5), 2024-04-25
Supplement: MOESM1 [file 27019190]

## Sheet: OVERVIEW
How to cite:
Viere et al. (2024): Global State of the Art of Teaching Life Cycle Assessment in Higher Education, Int. J. of LCA, Supplementary Material: Full survey data sets and results.
Tabsheet overview and explanation:
QUESTIONNAIRE	This is a visualisation of the entire questionnaire and the dependencies of all questions and answers in it.
RESPONDENT SET	This tabsheet contains all answers on the respondent level, i.e., all questions concerning the LCA teachers and their roles, qualifications etc.
COURSE SET	This tabsheet contains all answers on the course level, i.e., questions concering the LCA courses taught.
ANSWER CODES	This tabsheets lists all answer codes, i.e., the meaning behind the numbers in the RESPONDENTS and COURSE SET.
VARIABLES	Variables are assigned to the different answer options. This tabsheet explains all variables.

## Sheet: QUESTIONNAIRE
				QUESTIONNAIRE PATHS

## Sheet: RESPONDENT SET
VARIABLE	STARTED	OI18	OI10	OI04	OI01	OI06	OI13_01	OI13_02	OI13_03	TI01	TI02	TI10_01	TI10_02	TI10_03	TI10_04	TI10_05	TI10_06	TI10_07	TI10_08	TI10_11	TI10_12	TI10_10	TI10_09	TI10_09a	TI04	TI05	TI06x01	TI06x11	TI06x12	TI06x13	TI06x14	TI06x15	TI06x16	TI06x17	TI06x18	TI06x19	TI06x20	TI06x21	TI06x22	TI06x23	TI06x02	TI06x211	TI06x222	TI06x03	TI06x31	TI06x32	TI06x33	TI06x04	TI06x41
CASE	STARTED (Europe/Berlin)	work status internal	Location	size of institute	is LCA taught at institution (if LCA taught)	Use not teach lca	Thesis: Bachelor	Thesis: Master	Thesis: PhD	time of teach institute	time of teach personal	challenge: Teaching LCA to an audience with diverse backgrounds	challenge: Teaching the interdisciplinary nature of LCA to students within a specific discipline	challenge: Teaching how to integrate LCA with other methods and approaches	challenge: Having to come up with different application case studies each semester	challenge: Teaching how to define goal and scope	challenge: Teaching how to look for bias in LCA studies	challenge: Teaching the limitations of LCA	challenge: Teaching how to use and communicate LCA results	challenge: Explaining and using LCI databases	challenge: Coaching and supervising students' LCA applications	challenge: Keeping students motivated despite the complexity and challenges of LCA and balancing expectations	challenge: Other	challenge: Other (offene Eingabe)	developing	others teach lca	Reference: Textbooks	Reference: Bauman and Tillman (2004): The Hitch Hiker’s Guide to LCA: An orientation in life cycle assessment methodology and application	Reference: Curran (2012): Life Cycle Assessment Handbook: A Guide for Environmentally Sustainable Products	Reference: Finkbeiner (2016): Special Types of Life Cycle Assessment	Reference: Frischknecht (2020): Lehrbuch der Ökobilanzierung	Reference: Fullana and Puig (1994): Análisis del ciclo de la vida	Reference: Grisel and Osset (2004): L’Analyse du Cycle de Vie d’un produit ou d’un service : Applications et mise en pratique	Reference: Guinée (2002): Handbook on Life Cycle Assessment: Operational Guide to the ISO Standards	Reference: Hauschild and Huijbregts (2015): Life Cycle Impact Assessment	Reference: Hauschild et al. (2018): Life Cycle Assessment – Theory and Practice	Reference: Heijungs and Suh (2002): The Computational Structure of Life Cycle Assessment	Reference: Jolliet et al. (2015): Environmental Life Cycle Assessment	Reference: Klöpffer and Grahl (2014): Life Cycle Assessment (LCA): A Guide to Best Practice	Reference: Schenk and White (2014): Environmental Life Cycle Assessment: Measuring the environmental performance of products	Reference: Online textbooks	Reference: Matthews et al. (2020): Life Cycle Assessment – Quantitative Approaches for Decisions That Matter – Free Textbook and Other Learning Resources for the Global LCA Community	Reference: Sonnemann and Margni (2015): Life Cycle Management	Reference: Online teaching material	Reference: ILCA (2020)	Reference: UNEP (2020b)	Reference: Uni Freiburg (2020)	Reference: Standards and guidelines (to support and complement textbooks and other course material)	Reference: Benoît Norris et al. (2009)—Social LCA (UNEP/SETAC)
62	2021-09-07 07:48:26	3	Germany	3	1		0	5	1	2	2	0	0	0	0	0	1	1	0	0	0	1	0		2	1	1	0	1	0	0	0	0	0	0	1	0	0	1	0	1	1	0	0	0	0	0	1	0
77	2021-09-07 15:39:42	1	Germany	4	1		15	15	0	1	3	0	0	0	0	1	0	0	0	0	0	0	0		1	1	1	1	0	0	0	0	0	0	0	0	0	0	1	0	0	0	0	0	0	0	0	1	0
95	2021-09-08 09:31:01	1	Sweden	2	1		2	5	2	1	2	1	0	0	0	0	0	0	0	1	0	0	0		2	1	1	1	0	0	0	0	0	0	0	0	0	0	0	0	0	0	0	0	0	0	0	1	0
105	2021-09-08 17:16:06	1	Thailand	1	1		2	3	7	4	4	1	0	0	0	1	0	0	0	0	0	1	0		1	2	1	1	0	0	0	0	0	0	0	1	0	0	1	1	0	0	0	0	0	0	0	0	0
107	2021-09-08 17:28:47	1	Guadeloupe	4	1		0	0	2	4	4	1	1	0	0	0	0	0	0	0	0	0	0		1	1	1	0	0	0	0	0	0	0	0	0	0	0	0	0	1	1	0	1	0	0	0	1	0
112	2021-09-09 08:30:48	1	Denmark	4	1		0	3	5	3	3	1	1	0	0	0	0	0	0	0	0	0	0		2	1	0	0	0	0	0	0	0	0	0	0	0	0	0	0	1	1	0	0	0	0	0	1	0
117	2021-09-09 10:59:47	1	Denmark	4	1		34	20	1	4	4	1	1	0	0	0	0	0	0	0	1	1	0		1	1	0	0	0	0	0	0	0	0	0	0	0	0	0	0	1	1	0	1	1	0	0	1	0
155	2021-09-13 15:43:56	1	South Africa	4	1		2	4	1	3	3	1	0	0	0	0	0	0	1	0	0	0	0		1	2	0	0	0	0	0	0	0	0	0	0	0	0	0	0	0	0	0	0	0	0	0	0	0
167	2021-09-14 03:55:07	1	India	2	1		0	2	1	1	1	1	0	0	0	0	0	0	0	0	0	1	0		1	2	0	0	0	0	0	0	0	0	0	0	0	0	0	0	0	0	0	0	0	0	0	1	0
236	2021-09-15 18:22:08	2	Portugal	3	1		0	2	2	3	3	0	0	0	0	1	0	1	0	0	0	0	0		2	1	0	0	0	0	0	0	0	0	0	0	0	0	0	0	1	1	0	1	0	0	0	1	0
279	2021-09-15 20:48:39	3	Germany	4	1		2	1	0	2	2	0	0	1	1	1	1	1	1	0	1	1	0		2	1	1	1	0	0	0	0	0	0	1	1	0	0	0	0	0	0	0	0	0	0	0	1	0
283	2021-09-15 21:24:44	2	Austria	3	1		0	3	2	2	3	0	0	0	0	0	0	0	0	1	1	0	0		1	1	1	0	0	0	0	0	0	1	0	0	0	0	1	0	0	0	0	1	0	1	0	1	0
325	2021-09-16 08:29:12	2	Switzerland	1	1		2	3	0	3	2	0	0	1	0	0	1	0	0	1	0	0	1	Teaching software applications for LCA like SimaPro.	1	2	1	0	0	0	0	0	0	0	0	0	0	1	1	0	0	0	0	0	0	0	0	1	0
345	2021-09-16 11:47:49	2	Switzerland	1	1		4	4	0	3	3	1	1	0	0	1	0	1	1	1	1	1	0		1	1	1	0	0	0	1	0	0	0	0	0	0	1	1	0	0	0	0	0	0	0	0	1	0
357	2021-09-16 14:35:17	3	Finland	2	1		0	0	0	2	2	0	0	0	0	0	0	0	0	0	0	1	0		3	1	1	0	0	0	0	0	0	0	0	1	0	0	0	0	0	0	0	0	0	0	0	1	0
358	2021-09-16 14:56:26	1	Sweden	4	1		2	3	4	4	4	1	0	0	1	0	1	1	1	0	0	0	0		1	1	0	0	0	0	0	0	0	0	0	0	0	0	0	0	0	0	0	1	1	0	0	0	0
359	2021-09-16 16:54:03	2	Italia	4	1		0	2	1	4	4	0	0	0	0	0	0	0	0	0	1	0	0		1	1	0	0	0	0	0	0	0	0	0	0	0	0	0	0	0	0	0	1	0	1	0	1	0
366	2021-09-16 19:35:44	3	Canada	4	1		0	0	0	1	1	1	0	0	0	0	0	1	1	0	0	1	0		2	1	1	0	0	0	0	0	0	0	0	0	0	1	0	0	0	0	0	1	0	0	0	1	0
369	2021-09-16 19:41:56	2	Canada	1	1		0	0	0	4	3	1	1	0	0	0	1	0	0	0	0	1	0		2	1	1	0	0	0	0	0	0	0	0	1	0	1	0	0	0	0	0	1	0	0	0	1	0
405	2021-09-16 20:54:52	1	Ecuador	2	1		0	2	1	3	3	0	0	0	0	0	0	0	1	1	0	0	0		1	1	0	0	0	0	0	0	0	0	0	0	0	0	0	0	1	1	0	0	0	0	0	1	0
431	2021-09-16 21:13:33	1	Turkey	4	1	1	4	1	0	1	1	0	0	1	1	0	0	0	0	1	1	1	0		1	2	1	0	0	0	0	0	0	0	0	0	0	0	0	0	1	1	0	0	0	0	0	0	0
437	2021-09-16 22:15:46	1	Sweden	3	1		0	20	1	3	4	0	0	0	0	0	0	0	0	1	0	0	0		2	1	1	1	0	0	0	0	0	0	0	0	0	0	0	0	1	1	0	1	1	0	0	1	0
438	2021-09-16 22:33:45	1	United Kingdom	3	1		1	0	0	2	2	0	0	1	0	1	0	0	0	1	0	0	0		2		0	0	0	0	0	0	0	0	0	0	0	0	0	0	0	0	0	0	0	0	0	1	0
441	2021-09-16 22:52:59	1	Ireland	4	1		2	5	2	2	2	0	0	1	0	0	0	1	0	0	0	0	0		1	2	0	0	0	0	0	0	0	0	0	0	0	0	0	0	0	0	0	0	0	0	0	1	0
480	2021-09-17 09:21:28	1	Netherlands	2	1		2	2	2	2	2	1	0	0	0	0	1	0	0	0	0	1	0		2	1	0	0	0	0	0	0	0	0	0	0	0	0	0	0	0	0	0	0	0	0	0	1	0
513	2021-09-17 13:54:35	1	Italia	4	1		350	450	5	4	4	0	0	1	1	0	0	0	0	0	0	1	0		1	1	0	0	0	0	0	0	0	0	0	0	0	0	0	0	0	0	0	0	0	0	0	1	0
551	2021-09-18 10:48:04	2	United Kingdom	4	1		0	0	0	2	2	0	0	0	0	1	0	0	0	0	0	0	0		1	1	1	1	0	0	0	0	0	0	0	1	0	0	0	0	1	0	0	1	0	0	0	1	0
555	2021-09-19 12:43:32	3	Germany	2	1		1	3	0	2	2	0	0	1	0	0	0	0	0	0	0	0	0		2	1	0	0	0	0	0	0	0	0	0	0	0	0	0	0	1	1	0	1	0	0	1	0	0
563	2021-09-19 16:42:42	1	Italia	4	1		0	3	0	2	2	0	1	1	0	1	0	0	1	0	0	0	0		1	1	0	0	0	0	0	0	0	0	0	0	0	0	0	0	0	0	0	0	0	0	0	1	0
587	2021-09-20 11:37:23	3	Norway	2	1		1	1	0	1	2	1	1	0	0	0	0	0	0	0	0	0	0		2	1	0	0	0	0	0	0	0	0	0	0	0	0	0	0	1	1	0	0	0	0	0	1	0
606	2021-09-20 14:21:51	1	Pakistan	2	1	1	5	5	2	2	2	0	1	0	0	0	0	0	0	0	0	0	0		1	2	1	0	1	1	0	0	0	0	0	0	0	1	0	1	0	0	0	0	0	0	0	1	0
607	2021-09-20 14:26:22	1	Norway	2	1		10	1	0	2	2	0	0	1	0	0	1	1	1	0	0	0	0		2	1	0	0	0	0	0	0	0	0	0	0	0	0	0	0	1	0	0	1	0	0	0	1	0
612	2021-09-20 14:39:42	2	France	2	1		0	20	1	3	3	0	0	1	0	0	1	0	0	0	1	0	0		2	1	0	0	0	0	0	0	0	0	0	0	0	0	0	0	0	0	0	0	0	0	0	1	0
614	2021-09-20 14:46:24	2	France	1	1		0	20	2	2	2	0	0	0	1	1	0	0	0	0	0	0	0		2	1	1	0	0	0	0	0	0	0	1	0	0	1	0	0	0	0	0	0	0	0	0	0	0
752	2021-09-21 13:48:02	1	Latvia	4	1		0	3	1	4	4	1	1	0	0	0	0	0	1	1	0	1	0		1	2	1	1	0	0	0	0	0	1	0	1	0	0	0	0	0	0	0	1	0	0	0	1	1
872	2021-09-22 08:21:59	4	Germany	2	1		3	3	0	3	4	0	0	0	0	0	1	0	0	0	0	0	0		1	1	1	0	0	1	0	0	0	1	0	0	0	0	1	0	0	0	0	0	0	0	0	1	1
1053	2021-09-23 17:34:20	1	Portugal	2	1		0	3	2	4	4	0	0	0	1	0	0	0	1	0	1	0	0		1	2	1	1	0	0	0	0	0	0	0	0	0	0	0	0	1	0	1	0	0	0	0	1	0
1556	2021-09-27 13:08:52	3	Germany	4	1		0	2	0	1	1	0	0	0	1	0	0	0	0	0	0	1	0		2	1	1	0	0	0	0	0	0	0	0	1	0	0	1	0	0	0	0	0	0	0	0	1	0
1581	2021-09-27 15:41:52	1	France	1	1		0	48	0	3	3	0	1	1	0	1	0	1	1	1	1	1	0		1		1	0	0	0	0	0	0	0	0	0	0	1	0	0	0	0	0	0	0	0	0	1	0
1848	2021-09-28 21:53:28	1	Israel	4	1		0	4	2	4	4	1	0	0	1	0	0	0	0	0	1	1	0		1	1	1	0	0	0	0	0	0	1	0	0	0	0	0	0	0	0	0	1	0	0	1	1	1
2170	2021-09-30 17:45:35	1	Germany	1	1		3	1	0	2	3	0	0	0	0	0	0	1	0	0	0	0	1	Critically question results that are given in seemingly "hard" numbers	1	2	1	0	0	0	1	0	0	0	1	1	0	0	0	0	0	0	0	0	0	0	0	0	0
3249	2021-10-10 19:17:27	1	Indonesia	4	1		6	2	2	3	3	0	1	1	1	0	0	0	0	0	0	1	0		1	1	1	0	0	0	0	0	0	0	0	0	0	0	1	0	1	0	1	0	0	0	0	1	1
3404	2021-10-11 16:34:28	3	Canada	2	1		0	30	15	2	2	0	0	1	1	0	0	0	0	0	0	0	0		2	1	1	0	0	0	0	0	0	0	0	0	0	1	0	0	0	0	0	0	0	0	0	1	0
3413	2021-10-11 18:23:06	3	Sweden	1	1		20	0	0	1	2	0	0	0	0	0	0	0	0	0	0	1	0		1	2	0	0	0	0	0	0	0	0	0	0	0	0	0	0	0	0	0	1	0	1	0	0	0
3778	2021-10-14 08:39:22	1	Sweden	3	1		0	2	3	4	4	1	0	0	0	1	0	0	0	0	0	0	0		1	1	1	0	0	0	0	0	0	0	0	0	0	0	0	0	0	0	0	0	0	0	0	0	0
4283	2021-10-17 23:40:24	1	New Zealand	4	1		0	0	0	1	4	0	0	0	0	0	1	0	1	0	1	0	0		2	1	1	0	0	0	0	0	0	0	0	1	0	0	0	0	0	0	0	0	0	0	0	0	0
5275	2021-10-25 13:57:49	1	Spain	2	1		5	3	0	4	4	0	0	0	1	0	0	0	0	1	1	0	0		1	2	1	0	0	0	0	0	0	0	0	0	0	0	1	0	0	0	0	0	0	0	0	0	0
5305	2021-10-25 17:15:52	1	Portugal	3	1	1	0	2	8	1	1	1	1	0	0	0	1	0	0	0	0	1	0		1	1	1	0	0	0	0	0	0	0	0	0	0	0	0	0	1	0	0	1	1	0	0	1	0
5440	2021-10-26 11:36:54	1	United States	1	1		0	0	0	2	2	0	0	1	1	0	0	1	0	0	0	1	1	Combining LCA with environmental and social justice topics.	1	1	1	0	0	0	0	0	0	0	0	0	0	1	0	0	1	1	0	0	0	0	0	0	0
8033	2021-11-10 21:56:57	1	Brasil	2	1		1	4	4	3	3	1	0	0	0	0	0	0	1	0	0	0	0		1	2	1	1	1	0	0	0	0	1	0	1	0	0	1	0	1	1	0	1	1	0	0	1	0
8159	2021-11-11 20:16:51	2	México	4	1		0	10	4	4	4	1	0	0	0	0	0	0	0	1	0	0	1	Teaching with the development af a real LCA case. The need of dabase and software.	1		0	0	0	0	0	0	0	0	0	0	0	0	0	0	0	0	0	1	0	1	0	0	0
8229	2021-11-12 06:51:37	4	Germany	3	1		0	5	0	3	3	0	0	0	0	0	0	0	0	0	0	0	1	all named issues are challenging, however somewhat equally challenging. It is complex, but not more or less than others	1	2	0	0	0	0	0	0	0	0	0	0	0	0	1	0	0	0	0	1	1	1	0	1	0
8288	2021-11-12 14:57:07	1	Denmark	4	1		0	3	1	2	4	0	0	0	0	0	1	0	0	1	1	0	0		2	1	1	0	0	0	0	0	0	0	0	1	0	0	0	0	0	0	0	1	1	0	0	1	0
8346	2021-11-13 00:31:07	2	Brasil	4	1		1	1	0	2	2	1	1	0	0	0	1	0	1	0	0	0	0		1	1	1	0	0	0	0	0	0	0	0	1	0	0	1	0	0	0	0	1	0	1	0	0	0
8762	2021-11-16 10:21:49	3	Germany	4	1		1	2	0	2	2	1	1	0	0	0	1	1	0	0	0	1	0		2	1	1	1	0	0	0	0	0	0	0	0	0	0	1	0	0	0	0	0	0	0	0	1	0
8775	2021-11-16 10:30:15	2	France	1	1		0	2	2	2	3	1	0	0	0	0	0	1	0	0	0	0	0		2	1	1	0	0	0	0	0	0	0	1	0	0	1	0	0	0	0	0	0	0	0	0	1	0
8809	2021-11-16 12:26:12	1	Thailand	1	1		2	2	6	4	4	1	0	0	0	0	0	0	0	0	0	1	1	Students often find it difficult to understand the concepts of functional unit and co-product allocation (at least initially).	1	2	1	1	0	0	0	0	0	0	0	1	0	0	1	1	0	0	0	0	0	0	0	0	0
8823	2021-11-16 13:20:47	1	Italia	4	1		4	2	3	4	4	1	1	0	0	0	0	0	0	0	0	0	0		1	2	1	0	0	0	0	0	0	0	0	0	0	0	0	0	0	0	0	1	0	1	0	1	0
8830	2021-11-16 13:39:08	1	United States	4	1		0	2	2	4	4	1	0	0	1	1	0	0	0	1	1	0	0		1		0	0	0	0	0	0	0	0	0	0	0	0	0	0	1	1	0	0	0	0	0	1	0
8835	2021-11-16 14:21:27	2	France	1	1		0	2	1	4	4	0	1	0	0	0	0	1	0	0	0	0	0		1	1	1	0	0	0	0	0	0	0	0	0	0	1	0	0	0	0	0	0	0	0	0	1	0
8836	2021-11-16 14:30:31	1	United States	4	1		0	1	3	4	4	1	1	0	0	0	0	0	0	0	1	0	0		1		1	0	0	0	0	0	0	0	0	1	1	0	0	1	1	1	0	0	0	0	0	1	0
8842	2021-11-16 15:08:19	1	United States	4	1		0	3	3	3	3	1	0	0	0	1	0	0	1	1	0	0	0		1	2	1	0	1	0	0	0	0	1	0	0	1	0	0	0	0	0	0	0	0	0	0	1	0
8849	2021-11-16 15:12:04	2	Iceland	3	1		0	6	5	2	2	1	0	0	1	0	0	0	0	0	0	1	1	Bring practical examples for the different stages of LCA	1		1	0	0	0	0	0	0	0	0	1	0	0	0	0	0	0	0	0	0	0	0	1	0
8897	2021-11-16 17:39:15	1	South Korea	4	1		0	3	2	1	1	1	0	0	0	0	0	0	0	0	1	0	0		1	1	0	0	0	0	0	0	0	0	0	0	0	0	0	0	0	0	0	0	0	0	0	0	0
8912	2021-11-16 18:31:05	1	Germany	4	1		2	10	1	3	3	1	0	0	0	0	0	1	1	1	0	0	0		2	1	0	0	0	0	0	0	0	0	0	0	0	0	0	0	1	1	0	1	0	0	1	1	0
8921	2021-11-16 19:01:23	1	Germany	2	1		3	10	1	3	4	0	0	0	0	0	0	0	1	1	1	1	0		1	1	1	0	0	0	1	0	0	0	0	1	0	0	1	0	1	0	0	1	0	0	0	1	0
8925	2021-11-16 19:14:12	1	Italia	2	1		2	2	0	2	3	1	0	1	0	0	0	0	0	0	0	1	0		1	1	1	0	0	0	0	0	0	1	0	0	0	0	0	0	0	0	0	1	1	0	0	1	0
8941	2021-11-16 19:57:19	1	Netherlands	4	1		0	2	10	4	4	0	1	0	0	0	0	0	0	0	0	0	0		2	1	1	0	0	0	0	0	0	0	1	0	0	0	0	0	0	0	0	0	0	0	0	0	0
8953	2021-11-16 21:14:25	1	Germany	2	1		10	6	2	3	3	0	0	0	0	0	0	0	0	0	1	1	0		1	2	1	0	0	0	1	0	0	0	0	1	0	0	1	0	1	1	0	0	0	0	0	0	0
8979	2021-11-17 01:11:06	2	Brasil	4	1		1	1	3	3	4	0	1	1	0	0	0	0	0	0	0	1	0		1		1	0	0	0	0	0	0	0	0	1	0	0	0	0	1	1	0	1	1	1	1	1	0
9056	2021-11-17 07:44:40	1	Germany	2	1		3	3	1	4	4	1	0	1	0	0	0	0	0	1	1	0	1	Modeling aspects of LCA and theoretical / formal background (matrix method, process flowsheeting approaches	1	1	1	0	0	0	0	0	0	0	0	1	1	0	1	0	0	0	0	0	0	0	0	1	0
9074	2021-11-17 09:54:17	1	Norway	4	1		0	4	2	3	3	1	0	0	1	0	0	0	0	1	1	0	0		1	1	1	0	0	0	0	0	0	0	1	1	0	0	0	0	0	0	0	0	0	0	0	0	0
9078	2021-11-17 10:16:20	3	Germany	1	1		2	2	0	1	1	0	0	0	0	1	1	1	0	1	1	0	0		2	1	1	0	0	0	0	0	0	0	0	1	0	0	1	0	0	0	0	0	0	0	0	1	0
9083	2021-11-17 10:51:26	1	Netherlands	4	1		0	5	2	4	4	1	0	0	0	0	0	0	1	1	1	0	1	To teach them on properly dealing with and reporting on key methodological details such as multifunctionality in a transparent way while databases (and also scientific LCA literature) only offer limited opportunities to do and showcase this	2	1	1	0	0	0	0	0	0	1	0	0	1	0	0	0	0	0	0	0	0	0	0	1	0
9107	2021-11-17 16:48:34	1	Sweden	3	1		0	10	1	3	4	0	0	0	0	0	0	0	0	1	0	0	0		1	1	1	1	0	0	0	0	0	1	0	1	0	0	0	0	1	1	0	1	1	0	0	1	1
9109	2021-11-17 17:02:05	1	Germany	4	1		5	5	1	2	4	0	0	0	0	1	0	1	0	0	1	0	0		1	1	1	0	1	0	1	0	0	1	1	1	0	1	1	0	0	0	0	0	0	0	0	1	0
9115	2021-11-17 17:52:20	2	Germany	4	1		10	15	2	3	4	1	0	0	0	0	0	0	0	0	0	0	0		2	1	1	1	1	0	0	0	0	1	0	1	0	0	1	0	0	0	0	1	0	1	0	1	1
9239	2021-11-18 09:16:06	1	Japan	4	1		1	2	1	3	4	1	1	1	1	0	0	0	0	0	0	0	0		1	1	0	0	0	0	0	0	0	0	0	0	0	0	0	0	0	0	0	0	0	0	0	0	0
9287	2021-11-18 17:28:53	2	Switzerland	1	1	1	1	1	1	1	1	0	0	0	0	0	0	0	1	1	0	0	0		1	2	0	0	0	0	0	0	0	0	0	0	0	0	0	0	0	0	0	1	0	0	1	1	0
9296	2021-11-18 19:21:26	1	Germany	1	1		5	3	1	3	3	0	0	0	0	0	0	0	1	0	0	1	0		1	1	1	0	0	0	1	0	0	0	0	0	0	0	0	0	1	0	0	1	0	0	0	1	0
9391	2021-11-19 17:17:14	1	France	1	1		24	56	4	3	3	0	0	0	0	0	1	1	0	0	0	1	0		1	1	1	0	0	0	0	0	0	0	0	0	0	1	0	0	0	0	0	0	0	0	0	1	0
9677	2021-11-22 15:30:37	1	Germany	1	1		6	0	0	3	3	0	0	1	0	0	0	0	1	0	0	1	0		1	1	1	0	0	0	1	0	0	0	0	0	0	0	1	0	0	0	0	0	0	0	0	0	0
9696	2021-11-22 20:32:22	1	United States	4	1		2	0	0	1	1	0	0	1	0	0	1	0	1	0	1	0	0		1	1	0	0	0	0	0	0	0	0	0	0	0	0	0	0	1	1	0	1	0	1	0	1	0
9701	2021-11-22 22:02:52	1	Italia	1	1		1	0	0	4	4	1	1	0	0	0	0	1	0	0	0	0	0		2	2	0	0	0	0	0	0	0	0	0	0	0	0	0	0	0	0	0	0	0	0	0	0	0
9945	2021-11-25 06:40:01	3	Hungary	2	1		10	10	0	3	3	0	0	0	1	0	1	1	0	0	0	0	0		2	2	1	0	0	0	0	0	0	0	0	1	0	1	0	0	1	1	0	1	0	0	0	1	0
10301	2021-11-27 17:06:27	1	Denmark	3	1		0	5	7	3	3	0	0	0	1	1	0	0	0	1	0	0	0		1	1	1	0	0	0	0	0	0	0	0	1	0	0	0	0	0	0	0	0	0	0	0	1	0
10596	2021-11-29 19:48:17	1	Spain	1	1		2	0	0	3	3	0	1	0	1	0	0	0	0	0	0	0	0		1	2	1	0	0	0	0	1	0	0	0	0	0	0	0	0	1	0	1	0	0	0	0	0	0
10681	2021-11-30 10:25:44	1	Belgium	4	1		0	2	2	3	3	0	1	0	0	0	0	0	0	0	1	0	0		2	1	1	0	0	0	0	0	0	0	0	0	0	1	0	0	1	1	0	0	0	0	0	1	0
10683	2021-11-30 10:29:27	4	Spain	4	1		2	0	0	4	4	0	1	0	0	0	1	0	0	0	1	1	0		1		1	0	0	0	0	1	0	0	0	0	0	0	0	0	1	0	0	1	1	0	0	1	0
10684	2021-11-30 10:35:48	2	Spain	2	1		3	1	0	2	3	1	1	0	0	0	0	0	1	0	0	1	0		1		1	0	0	0	0	0	0	1	0	1	0	0	0	0	1	1	0	1	1	1	0	1	0
10688	2021-11-30 10:48:19	1	Czech Republic	1	1		1	4	1	4	4	1	1	0	0	0	0	0	0	0	0	0	0		1	2	0	0	0	0	0	0	0	0	0	0	0	0	0	0	0	0	0	0	0	0	0	0	0
10699	2021-11-30 11:37:41	1	India	3	1		0	2	4	3	4	1	0	1	1	1	1	0	0	0	0	1	0		1	1	1	0	1	0	0	0	0	1	0	1	0	0	0	0	1	0	0	1	0	1	0	1	0
10704	2021-11-30 11:43:54	1	Japan	4	1		2	2	1	2	2	0	1	0	0	1	0	0	1	1	1	1	0		1	1	0	0	0	0	0	0	0	0	0	0	0	0	0	0	0	0	0	0	0	0	0	1	0
10729	2021-11-30 13:59:43	1	United States	4	1	1	0	2	8	4	4	0	0	0	0	0	0	0	0	0	0	0	1	None	1	2	1	0	0	0	0	0	0	0	0	0	0	0	0	0	0	0	0	0	0	0	0	0	0
10735	2021-11-30 14:22:31	1	United Kingdom	4	1		2	6	4	3	3	1	1	0	0	0	0	0	0	0	0	0	0		1	2	0	0	0	0	0	0	0	0	0	0	0	0	0	0	0	0	0	0	0	0	0	1	0
10771	2021-11-30 17:52:17	1	Germany	1	1		0	1	0	1	3	0	0	0	0	0	0	0	0	0	0	0	1	providing best practice including templates and good examples which are difficult to find open access.	1	2	0	0	0	0	0	0	0	0	0	0	0	0	0	0	0	0	0	1	0	1	0	0	0
10780	2021-11-30 18:35:57	1	Spain	4	1		0	1	0	2	3	1	0	0	1	0	0	1	0	0	1	0	0		1		1	0	0	0	0	0	0	0	0	1	0	0	1	0	0	0	0	0	0	0	0	1	0
10837	2021-12-01 02:25:33	3	Argentina	1	1		10	0	0	3	3	0	1	0	0	1	0	1	1	0	0	0	0		2	1	0	0	0	0	0	0	0	0	0	0	0	0	0	0	0	0	0	1	0	1	0	1	0
10876	2021-12-01 05:30:22	1	Japan	2	1		0	0	0	4	4	1	0	0	0	0	0	0	0	0	0	0	0		1	2	0	0	0	0	0	0	0	0	0	0	0	0	0	0	0	0	0	0	0	0	0	0	0
10943	2021-12-01 11:12:48	2	United Kingdom	4	1		0	0	2	3	4	1	0	0	0	0	0	1	0	0	0	0	0		1	2	1	1	0	0	0	0	0	0	0	0	0	0	0	0	0	0	0	0	0	0	0	1	0
11025	2021-12-01 16:29:27	1	Denmark	2	1		0	2	2	3	3	1	0	1	1	0	0	0	1	0	0	0	0		1	1	1	0	0	0	0	0	0	0	1	1	0	0	0	0	0	0	0	1	0	1	0	1	0
11034	2021-12-01 17:06:08	2	Denmark	2	1		3	8	3	3	4	0	0	0	1	0	0	1	1	0	0	0	0		1	1	1	0	0	0	0	0	0	0	1	1	0	0	0	0	0	0	0	0	0	0	0	1	0
11049	2021-12-01 17:45:28	3	Denmark	4	1		6	3	0	1	2	0	1	0	0	0	0	1	1	0	0	1	0		2	1	1	0	0	0	0	0	0	0	0	1	0	0	0	0	0	0	0	1	1	0	0	1	0
11172	2021-12-02 09:40:45	2	United Kingdom	1	1		0	5	1	2	3	1	0	0	0	0	0	1	0	0	0	1	0		2	1	1	0	0	0	0	0	0	0	0	1	0	0	0	0	0	0	0	1	1	1	0	1	0
11201	2021-12-02 13:19:54	1	France	1	1		100	140	3	4	4	0	0	1	1	0	0	0	0	0	1	0	0		1		1	0	0	0	0	0	1	1	0	1	0	1	0	0	1	0	0	0	0	0	0	1	0
11203	2021-12-02 13:58:09	2	Finland	2	1		3	10	1	4	4	1	1	0	0	1	0	0	0	1	0	0	0		1	1	1	0	0	0	0	0	0	0	0	0	0	0	1	0	0	0	0	0	0	0	0	1	0
11247	2021-12-02 17:56:19	1	Germany	4	1		10	5	2	4	4	0	0	1	0	1	1	1	1	0	0	0	0		2	1	1	1	0	0	0	0	0	0	0	0	1	0	1	0	0	0	0	1	1	1	0	1	0
11338	2021-12-03 06:01:43	1	Japan	4	1		100	20	0	4	4	1	1	0	0	0	0	0	0	1	0	0	0		1	1	1	0	0	1	0	0	0	0	0	0	0	0	0	0	0	0	0	0	0	0	0	0	0
11417	2021-12-03 17:01:06	2	Austria	4	1		0	0	0	2	2	0	0	0	0	0	0	0	0	0	1	1	0		2	1	0	0	0	0	0	0	0	0	0	0	0	0	0	0	0	0	0	0	0	0	0	1	0
11597	2021-12-04 19:48:17	1	Portugal	4	1		0	2	6	4	4	1	0	0	0	0	1	0	0	0	1	0	0		1		0	0	0	0	0	0	0	0	0	0	0	0	0	0	0	0	0	0	0	0	0	0	0
11883	2021-12-06 15:28:58	1	Peru	4	1		4	1	1	3	3	1	1	0	0	0	1	0	1	0	1	0	0		2	1	0	0	0	0	0	0	0	0	0	0	0	0	0	0	0	0	0	1	1	1	0	1	0
12074	2021-12-07 16:19:36	1	Ireland	4	1		0	1	5	4	4	0	0	1	0	0	0	0	0	0	1	0	1	misunderstanding of the nature and uses of LCA	1		1	1	0	0	0	0	0	0	0	0	0	1	0	0	1	0	0	1	1	1	0	1	0
13013	2021-12-14 04:30:15	2	Australia	4	1		2	2	1	2	2	0	0	0	0	0	0	0	0	1	1	1	0		1	1	1	1	0	0	0	0	0	0	0	1	0	0	0	0	0	0	0	0	0	0	0	1	0
13053	2021-12-14 10:21:37	1	Australia	4	1		2	2	2	3	3	0	0	0	0	0	0	0	1	0	0	1	0		1	1	1	0	0	0	0	0	0	0	0	1	0	0	0	0	0	0	0	1	0	0	1	1	0
13118	2021-12-14 20:45:43	1	New Zealand	3	1		2	1	0	1	4	0	0	0	0	0	0	0	0	0	0	0	1	I teach LCA within a broader sustainability course. This really limits the time that I have to get into using LCI databases and "full" LCA software like SimaPro / openLCA. Teaching is limited to streamlined LCA, which is less powerful.	1		0	0	0	0	0	0	0	0	0	0	0	0	0	0	1	1	0	1	1	0	0	1	0
14294	2021-12-24 08:15:31	1	China (People's Republic of China)	4	1		50	0	0	4	1	0	0	0	0	0	1	0	0	0	1	0	0		1	2	0	0	0	0	0	0	0	0	0	0	0	0	0	0	0	0	0	0	0	0	0	1	0
37	2021-09-06 19:50:24	7		4	1		140	49	10	1	1	0	0	0	0	0	0	0	0	0	0	1	0		2	1	0	0	0	0	0	0	0	0	0	0	0	0	0	0	0	0	0	1	0	1	0	1	0
56	2021-09-07 03:03:14	6		2	1		0	0	0	2	3	0	0	0	0	0	0	0	0	0	0	1	0		1	1	0	0	0	0	0	0	0	0	0	0	0	0	0	0	0	0	0	1	0	1	0	1	1
76	2021-09-07 15:30:43	5	Jakarta	1	1		1	7	1	1	1	1	1	0	1	0	0	1	0	1	0	1	0		2	2	1	0	1	0	0	0	0	0	0	1	0	0	1	0	1	1	1	1	0	1	0	1	0
232	2021-09-15 17:41:44	6	France	4	1		0	20	0	2	2	0	0	0	0	0	0	0	0	0	0	1	0		1		0	0	0	0	0	0	0	0	0	0	0	0	0	0	0	0	0	0	0	0	0	1	0
240	2021-09-15 18:31:32	5	Mexico	4	1		2	4	2	2	2	1	0	0	0	0	0	0	0	1	0	0	1	Resources, no acces to software and databases coming from developing countries	2	1	0	0	0	0	0	0	0	0	0	0	0	0	0	0	0	0	0	1	0	1	0	1	0
299	2021-09-16 03:35:18	6		4	1		0	0	0	2	2	0	0	0	1	0	0	0	0	0	0	1	1	Put in perspective what it can be used for in their day to day engineer work	2	1	1	0	0	0	0	0	0	0	0	0	0	1	0	0	0	0	0	0	0	0	0	1	1
582	2021-09-20 10:19:41	6		4	1		0	1	0	1	1	1	0	0	0	0	0	1	1	0	0	0	0		2	1	0	0	0	0	0	0	0	0	0	0	0	0	0	0	1	0	0	1	0	0	1	0	0
608	2021-09-20 14:32:48	5		4	1		0	2	3	3	4	0	1	0	0	0	0	0	1	0	0	1	0		1	2	0	0	0	0	0	0	0	0	0	0	0	0	0	0	0	0	0	1	0	1	0	1	0
884	2021-09-22 10:43:57	6	Spain	1	1		0	6	0	3	3	0	0	0	0	0	0	0	0	1	0	0	0		1	2	1	0	0	0	0	1	0	0	0	1	0	0	0	0	1	1	0	0	0	0	0	1	0
8142	2021-11-11 18:41:10	6		4	1		0	0	0	2	3	0	0	0	1	0	0	0	0	0	1	0	1	The biggest challenge I have identified is to include all the methodology in one semester class. It is sometimes considered a lot of new information in limited time.	1		0	0	0	0	0	0	0	0	0	0	0	0	0	0	1	1	0	0	0	0	0	0	0
8778	2021-11-16 10:35:55	5	Spain	4	1		0	0	1	2	2	0	0	0	0	0	0	0	0	0	0	0	1	Finding affordable-to-understand case studies that show the complexity of LCA at the same time	1		0	0	0	0	0	0	0	0	0	0	0	0	0	0	0	0	0	0	0	0	0	1	0
8782	2021-11-16 10:58:46	7	France	3	1		0	200	0	3	3	0	0	0	0	0	0	0	0	0	0	1	0		1	1	0	0	0	0	0	0	0	0	0	0	0	0	0	0	0	0	0	1	0	0	0	1	0
8784	2021-11-16 11:03:09	5		1	1		0	0	0	2	3	0	0	0	0	0	1	1	0	0	0	0	1	teaching LCA without free databases available that students could use by themselves in free softwares	1	2	1	0	0	0	0	0	0	0	0	0	0	1	0	0	0	0	0	0	0	0	0	1	0
8803	2021-11-16 12:13:36	5		4	1		40	150	0	3	4	1	0	0	0	1	0	0	0	1	0	0	0		1		1	1	0	0	0	0	0	0	0	0	0	1	0	0	0	0	0	1	0	1	0	1	0
8950	2021-11-16 21:01:01	5	Brazil	2	1		0	0	0	3	4	0	1	0	0	0	0	0	0	0	0	0	0		2	2	0	0	0	0	0	0	0	0	0	0	0	0	0	0	0	0	0	0	0	0	0	1	0
8958	2021-11-16 22:00:38	6		3	1		0	0	0	3	3	0	0	0	0	0	0	0	1	1	0	0	1	My course has too few hours for teaching LCA in detail	2	1	1	0	1	1	0	0	0	1	0	0	0	0	0	0	0	0	0	1	0	1	0	1	0
9070	2021-11-17 09:53:41	5		4	1		3	6	5	3	3	0	1	0	0	0	0	0	0	0	0	0	1	LCA is complicated. The idiosyncrasies make it not intuitive	1	1	0	0	0	0	0	0	0	0	0	0	0	0	0	0	1	1	0	0	0	0	0	0	0
9128	2021-11-17 20:05:52	7		4	1		0	1	0	3	3	1	0	1	0	0	0	1	0	0	0	0	0		1		0	0	0	0	0	0	0	0	0	0	0	0	0	0	0	0	0	0	0	0	0	0	0
9275	2021-11-18 15:38:09	5		1	1		5	2	1	3	3	0	0	1	0	0	0	0	0	1	0	0	0		1	2	1	1	0	1	0	0	0	1	0	1	0	1	0	0	1	1	0	1	0	1	0	1	0
9307	2021-11-19 00:12:12	5		2	1		0	0	0	2	2	1	0	0	0	0	0	0	0	0	0	0	0		1	2	0	0	0	0	0	0	0	0	0	0	0	0	0	0	0	0	0	0	0	0	0	1	1
9800	2021-11-23 21:56:06	5		1	1		0	1	0	3	3	0	0	0	0	0	1	1	0	1	0	1	0		1	1	1	0	0	0	0	0	0	0	0	0	0	1	0	0	0	0	0	0	0	0	0	0	0
9824	2021-11-24 03:37:28	5		4	1		0	50	8	4	4	0	1	0	0	0	0	0	0	0	0	0	0		1		1	0	0	0	0	0	0	0	0	0	0	0	0	0	0	0	0	1	0	0	0	1	0
10054	2021-11-25 23:08:06	6		2	1		20	5	0	2	3	0	0	0	0	0	0	0	0	0	0	0	1	I do not see big challenges in teaching LCA	1	1	1	0	0	1	0	0	0	1	0	0	0	0	0	0	0	0	0	1	0	1	0	1	0
10810	2021-11-30 21:12:08	5	Thailand	2	1		1	3	6	4	4	0	0	0	0	0	0	0	0	0	0	0	1	system thinking	1	1	1	0	0	0	0	0	0	0	0	1	0	1	0	0	0	0	0	0	0	0	0	0	0
10948	2021-12-01 11:57:57	6		1	1		0	3	0	3	3	0	0	0	0	1	0	0	0	0	0	0	0		2	1	1	0	0	0	1	0	0	0	0	0	0	0	1	0	0	0	0	0	0	0	0	1	0
11033	2021-12-01 16:50:40	5		2	1		6	10	1	4	4	1	0	0	0	1	0	0	0	1	0	0	0		1	1	0	0	0	0	0	0	0	0	0	0	0	0	0	0	0	0	0	0	0	0	0	0	0
11041	2021-12-01 17:09:35	5		1	1		4	2	0	4	4	0	0	0	0	0	0	0	0	0	0	1	0		1	2	0	0	0	0	0	0	0	0	0	0	0	0	0	0	0	0	0	1	0	1	0	0	0
11184	2021-12-02 12:00:16	5		3	1		1	1	2	2	2	0	0	0	1	0	0	0	1	1	0	1	0		1	1	0	0	0	0	0	0	0	0	0	0	0	0	0	0	0	0	0	0	0	0	0	1	0
11378	2021-12-03 11:01:26	5		2	1		4	2	1	4	2	0	0	1	0	0	0	0	0	0	0	0	0		1	2	1	1	1	0	0	0	0	0	0	0	0	0	0	0	0	0	0	0	0	0	0	0	0
11421	2021-12-03 17:34:39	5		4	1		5	3	0	3	4	0	0	0	0	0	0	0	0	0	0	1	1	Elements of uncertainty if LCA, e.g. quality of data, validity of results	1	1	1	0	0	0	0	0	0	0	0	0	0	0	0	0	1	0	0	1	0	0	0	1	0
11895	2021-12-06 17:25:08	5		2	1		1	1	0	3	3	0	0	0	1	0	0	0	0	1	0	0	0		1	2	0	0	0	0	0	0	0	0	0	0	0	0	0	0	0	0	0	0	0	0	0	1	0
12195	2021-12-08 08:25:56	5		3	1		0	4	4	2	2	1	0	1	1	0	0	1	0	1	0	1	0		1	1	1	1	0	0	0	0	0	0	0	1	0	0	0	0	1	1	1	1	1	1	0	1	1
12591	2021-12-10 23:20:57	5		4	1		3	2	3	4	4	1	1	0	0	0	1	0	1	1	0	0	0		1	2	1	0	1	0	0	0	0	0	0	0	0	0	0	0	0	0	0	0	0	0	0	0	0
13008	2021-12-14 04:02:17	5		4	1		5	2	2	3	3	0	0	0	0	0	1	1	0	0	0	1	0		1	1	1	0	0	0	0	0	0	0	0	1	0	0	0	0	0	0	0	0	0	0	0	1	0
13192	2021-12-15 09:16:28	5	Algeria	4	1		0	4	1	1	3	0	0	0	0	0	0	1	1	1	1	0	0		1	2	1	0	1	0	0	0	0	0	0	0	0	1	1	0	0	0	0	1	1	0	0	1	0
13491	2021-12-17 14:42:01	6		2	1		6	1	0	3	3	1	0	1	0	0	0	0	0	0	0	1	0		1	1	1	1	0	0	0	0	0	0	0	0	0	0	0	0	1	0	0	1	0	1	0	1	0
[truncated: 57 more columns]

## Sheet: COURSE SET
VARIABLE	STARTED	OI10	LA01	SI01_01	SI05_01	SI06_01	LC05	LC05_01	LC05_02	LC05_03	LC05_04	LC05_05	LC05_06	LC05_06a	LC01	LC01_06	WL01_02	WL01_03	WL01_04	WL01_05	WL01_06	WL01_07	WL01_08	WL01_09	WL01_10	WL01_11	WL01_12	WL01_13	WL01_14	WL01_15	WL02_01 & WL02_02 COMBINED	SI10
CASE	STARTED (Europe/Berlin)	Location	academic level 1	Program 1: [01]	Students per year (No. student 1: [01])	LCA teachers per year (No. teacher 1: [01])	Summe (Integration 1: Ausweichoption (negativ) oder Anzahl 1er Optionen)	Integration 1: Single lecture or short series of lectures (as part of a wider course, unit, or module)	Integration 1: Standalone module, unit, or course	Integration 1: Minor specialization (comprised of multiple modules, units, or courses)	Integration 1: Major specialization (comprised of multiple modules, units, or courses)	Integration 1: Research specialization	Integration 1: Other	Integration 1: Other (offene Eingabe)	competency 1	competency 1: Other	workload 1: Life cycle thinking and LCA context	workload 1: LCA terminology and standards	workload 1: LCI modeling and data	workload 1: LCIA - Environmental Impact Assessment Methods	workload 1: Interpretation incl. sensitivity and uncertainty	workload 1: Advanced LCA methodology (attributional vs. consequential, system expansion, ...)	workload 1: Special types of LCA (CFP, WFP, LCSA, O O-LCA, EEIO EEIO-LCA, ...)	workload 1: Life Cycle Management (use of LCA results for innovation & communication)	workload 1: Case study / project work - interpreting given cases	workload 1: Case study / project work - conducting own case studies	workload 1: Software use - Excel and simplified approaches	workload 1: Software use - Comprehensive LCA software packages	workload 1: Software use - LCI databases	workload 1: Other	Total 1: Total LCA workload within the whole study program	other program 1
62	2021-09-07 07:48:26	Germany	2	no disclosure (confidentiality)	50	2	1	0	1	0	0	0	0		3																210	No
77	2021-09-07 15:39:42	Germany	2	no disclosure (confidentiality)	120	1	2	1	1	0	0	0	0		2		1	2	3	2	1	0	0	0	1	1	0	0	0	0	11	No
95	2021-09-08 09:31:01	Sweden	2	no disclosure (confidentiality)	50	2	1	0	1	0	0	0	0		2		10	5	20	20	10				5	80		40			150	No
105	2021-09-08 17:16:06	Thailand	5	no disclosure (confidentiality)	15	1	3	1	1	0	0	1	0		3		3	3	6	9	6					18					45	No
107	2021-09-08 17:28:47	Guadeloupe	4	no disclosure (confidentiality)	25	4	1	0	1	0	0	0	0		3			8	24	4	8		30			20		30	10		134	No
112	2021-09-09 08:30:48	Denmark	2	no disclosure (confidentiality)	25	3	2	0	0	0	1	1	0		3		5	5	30	10	5	10	0	5	0	30		20	20		150	No
117	2021-09-09 10:59:47	Denmark	5	no disclosure (confidentiality)	60	4	2	1	0	0	0	0	1	½ semester project modules focused at LCA (this is where the learning is most efficient!)	4																	No
155	2021-09-13 15:43:56	South Africa	1	no disclosure (confidentiality)	170	1	1	1	0	0	0	0	0		1		2	1	1	1											4	Yes
167	2021-09-14 03:55:07	India	2	no disclosure (confidentiality)	20	1	1	0	1	0	0	0	0		2		2	2	6	6	2	0	6		2	4	4	0	0		34	No
236	2021-09-15 18:22:08	Portugal	2	no disclosure (confidentiality)	80	2	1	0	1	0	0	0	0		3		0.5	1	1	1	1	0.25	0.25	0.5	1	8.5	0	1.5	0.5		17	No
279	2021-09-15 20:48:39	Germany	5	no disclosure (confidentiality)	60	3	1	0	1	0	0	0	0		3																70	No
283	2021-09-15 21:24:44	Austria	2	no disclosure (confidentiality)	20	4	2	1	1	0	0	0	0		6	Depends on the course										15		15	15		45	No
325	2021-09-16 08:29:12	Switzerland	2	no disclosure (confidentiality)	20	5	2	1	1	0	0	0	0		3		2	1	0.5	0.5	0.25	0.02		4	5	60	5	10	3		90	Yes
345	2021-09-16 11:47:49	Switzerland	2	no disclosure (confidentiality)	35	3	1	0	1	0	0	0	0		2		10					20	30			15		15			90	Yes
357	2021-09-16 14:35:17	Finland	2	no disclosure (confidentiality)	50	3	1	0	1	0	0	0	0		3		5	4	5	6	6	10	3	5	82			9	8	41	184	No
358	2021-09-16 14:56:26	Sweden	2	no disclosure (confidentiality)	140	4	2	1	0	0	1	0	0		4		20	20	20	20	20	20				80		40			240	Yes
359	2021-09-16 16:54:03	Italia	2	no disclosure (confidentiality)	70	2	1	0	1	0	0	0	0		4																150	Yes
366	2021-09-16 19:35:44	Canada	1	no disclosure (confidentiality)	25	1	1	0	1	0	0	0	0		3		6	3	12	12	12	3	0.5	1	3	40	0	3	0.5	Uncertainties, limits, 2 hours	200	Yes
369	2021-09-16 19:41:56	Canada	2	no disclosure (confidentiality)	70	3	2	1	1	0	0	0	0		3		3	1	3	6	3	1	1		3	39	3		12	3	78	No
405	2021-09-16 20:54:52	Ecuador	2	no disclosure (confidentiality)	20	1	1	0	1	0	0	0	0		3		10	10	10	10		10				36	10				96	No
431	2021-09-16 21:13:33	Turkey	5	no disclosure (confidentiality)	25	1	2	0	1	0	0	1	0		3		4	4	4	4	4	4	4	4	4	4	4	4	4		56	No
437	2021-09-16 22:15:46	Sweden	2	no disclosure (confidentiality)	100	5	2	1	1	0	0	0	0		2																200	No
438	2021-09-16 22:33:45	United Kingdom	1	no disclosure (confidentiality)	25	2	1	1	0	0	0	0	0		1		10	5			5					5	5				20	Yes
441	2021-09-16 22:52:59	Ireland	2	no disclosure (confidentiality)	80	1	1	1	0	0	0	0	0		2		1	1	4	3	8				1		1		1		20	No
480	2021-09-17 09:21:28	Netherlands	2	no disclosure (confidentiality)	5	3	1	1	0	0	0	0	0		2		4	2		2	2		1					1			12	No
513	2021-09-17 13:54:35	Italia	2	no disclosure (confidentiality)	150	3	1	1	0	0	0	0	0		2		2	1	1	2					2			2			10	Yes
551	2021-09-18 10:48:04	United Kingdom	1	no disclosure (confidentiality)	100	1	1	1	0	0	0	0	0		2		4	4	4	4	2					14	6				150	No
555	2021-09-19 12:43:32	Germany	2	no disclosure (confidentiality)	30	2	1	0	1	0	0	0	0		3		10	10	15	15	5	5	0	5		30		35	20		150	No
563	2021-09-19 16:42:42	Italia	2	no disclosure (confidentiality)	50	1	1	1	0	0	0	0	0		2		2	2	2	4	1	2			1	4		6			24	No
587	2021-09-20 11:37:23	Norway	2	no disclosure (confidentiality)	25	1	1	1	0	0	0	0	0		1																30	No
606	2021-09-20 14:21:51	Pakistan	2	no disclosure (confidentiality)	30	1	1	0	0	0	0	1	0		2		33	33	3	3		3									33	Yes
607	2021-09-20 14:26:22	Norway	1	no disclosure (confidentiality)	50	3	1	0	1	0	0	0	0		2											16		16			32	No
612	2021-09-20 14:39:42	France	2	no disclosure (confidentiality)	20	2	1	0	1	0	0	0	0		3		2	1	3	3	3	0	0	1	0	8	4	8	4		24	No
614	2021-09-20 14:46:24	France	2	no disclosure (confidentiality)	20	2	1	0	1	0	0	0	0		3		1	1	1	1						16		10	10		40	No
752	2021-09-21 13:48:02	Latvia	2	no disclosure (confidentiality)	30	3	1	0	1	0	0	0	0		3		2	6	6	4	4	2	1	4	12	12		6	2	1	64	No
872	2021-09-22 08:21:59	Germany	2	no disclosure (confidentiality)	50	1	1	0	1	0	0	0	0		3		1	1	6	2	1	1				3					15	No
1053	2021-09-23 17:34:20	Portugal	5	no disclosure (confidentiality)	55	1	3	0	1	1	0	1	0		4								7		14			24	24		16	Yes
1556	2021-09-27 13:08:52	Germany	2	no disclosure (confidentiality)	200	2	2	1	1	0	0	0	0		1		2	2	2	2	2	0	0	0	140	100	4	44	2		300	No
1581	2021-09-27 15:41:52	France	2	no disclosure (confidentiality)	48	1	2	1	1	0	0	0	0		2		2	1	1									5			9	No
1848	2021-09-28 21:53:28	Israel	2	no disclosure (confidentiality)	40	1	3	1	1	0	0	1	0		1																20	No
2170	2021-09-30 17:45:35	Germany	5	no disclosure (confidentiality)	30	1	1	0	0	1	0	0	0		3		5	10	20	20	5	60	0			60	0	30	30		240	No
3249	2021-10-10 19:17:27	Indonesia	1	no disclosure (confidentiality)	30	2	1	0	1	0	0	0	0		4										2	6					30	No
3404	2021-10-11 16:34:28	Canada	2	no disclosure (confidentiality)	80	3	1	0	1	0	0	0	0		3		10	5	10	5	10	5				30		15			90	No
3413	2021-10-11 18:23:06	Sweden	1	no disclosure (confidentiality)	100	1	1	1	0	0	0	0	0		1		2	2													4	No
3778	2021-10-14 08:39:22	Sweden	1	no disclosure (confidentiality)	250	3	2	1	1	0	0	0	0		2																16	No
4283	2021-10-17 23:40:24	New Zealand	1	no disclosure (confidentiality)	8	2	1	1	0	0	0	0	0		2																40	No
5275	2021-10-25 13:57:49	Spain	1	no disclosure (confidentiality)	12	1	1	0	1	0	0	0	0		3		4	2	10	2	2					18	4	4	4		60	Yes
5305	2021-10-25 17:15:52	Portugal	2	no disclosure (confidentiality)	20	1	1	0	1	0	0	0	0		2		1	1	3	3	3			2	4	12	2	3	3	LCC - 2; Multicriteria assessment methods - 1; Multi-objective optimization - 1	41	No
5440	2021-10-26 11:36:54	United States	1	no disclosure (confidentiality)	55	2	2	1	1	0	0	0	0		6	Depends on which course. I teach two: one course is introductory and focuses more on concepts, the second course is design based and more applied.															50	No
8033	2021-11-10 21:56:57	Brasil	2	no disclosure (confidentiality)	15	2	2	0	1	0	0	1	0		2																60	No
8159	2021-11-11 20:16:51	México	2	no disclosure (confidentiality)	15	1	1	0	0	0	1	0	0		2		2	2	12	4	4	0	4	0	0	20	0	8	8		64	No
8229	2021-11-12 06:51:37	Germany	2	no disclosure (confidentiality)	30		2	0	0	1	0	1	0		2		10	5	10	5	15	5	5	15	5	40	0	20	15		150	No
8288	2021-11-12 14:57:07	Denmark	1	no disclosure (confidentiality)	45	3	1	0	1	0	0	0	0		3		2	2	4	8	4	4	0	4	4	70	0	30	4		136	Yes
8346	2021-11-13 00:31:07	Brasil	5	no disclosure (confidentiality)	8	2	1	1	0	0	0	0	0		1		1				0.5	0.5		1					1		4	No
8762	2021-11-16 10:21:49	Germany	2	no disclosure (confidentiality)	80	4	1	0	1	0	0	0	0		2																150	No
8775	2021-11-16 10:30:15	France	2	no disclosure (confidentiality)	50	5	1	0	1	0	0	0	0		2		5	5	5	5	5	0	0	2	3	10	0	10	10		60	Yes
8809	2021-11-16 12:26:12	Thailand	5	no disclosure (confidentiality)	15	1	3	1	1	0	0	1	0		2											30					45	No
8823	2021-11-16 13:20:47	Italia	1	no disclosure (confidentiality)	60	1	1	0	0	1	0	0	0		1		1	1				0	1	1				0	0		4	Yes
8830	2021-11-16 13:39:08	United States	5	no disclosure (confidentiality)	25	1	2	0	0	1	0	1	0		3		3	1	6	6	6		1	2	2	12		9			50	No
8835	2021-11-16 14:21:27	France	2	no disclosure (confidentiality)	25	3	1	0	1	0	0	0	0		3		4	4	4	8						30		30			70	No
8836	2021-11-16 14:30:31	United States	5	no disclosure (confidentiality)	100	2	1	0	1	0	0	0	0		3		5	5	50	10	10	1	5	0	10	50	20	50	20		200	No
8842	2021-11-16 15:08:19	United States	1	no disclosure (confidentiality)	90	1	2	1	0	0	0	0	1	Group projects using LCA	3		3	5	10	3	3	1	0.5	2	1	10	0	20	20		30	Yes
8849	2021-11-16 15:12:04	Iceland	2	no disclosure (confidentiality)	35	2	1	0	0	0	0	0	1	One course is offered on LCA	4		10	10	20	20	10	10		15	15	60			10		180	No
8897	2021-11-16 17:39:15	South Korea	5	no disclosure (confidentiality)	15	1	1	0	1	0	0	0	0		2																120	No
8912	2021-11-16 18:31:05	Germany	2	no disclosure (confidentiality)	60	3	2	0	1	1	0	0	0		3																300	No
8921	2021-11-16 19:01:23	Germany	1	no disclosure (confidentiality)	30	2	1	0	0	1	0	0	0		2		5	5	10	30	5		5			40	20	20	10		150	Yes
8925	2021-11-16 19:14:12	Italia	2	no disclosure (confidentiality)	35	2	1	1	0	0	0	0	0		2		3	1	2	1	1	0	0	0	2	2	2	0	0		14	No
8941	2021-11-16 19:57:19	Netherlands	2	no disclosure (confidentiality)	40	6	2	1	1	0	0	0	0		3		8	8	16	16	16	8	0	8	0	60	0	20			160	Yes
8953	2021-11-16 21:14:25	Germany	2	no disclosure (confidentiality)	50	2	1	0	0	0	1	0	0		2		10	10	40	10	10	10				40		30	10		150	Yes
8979	2021-11-17 01:11:06	Brasil	5	no disclosure (confidentiality)	30	3	2	0	1	0	0	1	0		4		3	3	3	3	3	1	0.5	1	3	6	1	3	3		34	No
9056	2021-11-17 07:44:40	Germany	5	no disclosure (confidentiality)	60	2	2	0	1	0	0	0	1	Project-oriented Minor, in future in cooperation with C2C	2		10	10	30	5	5					30		30	10	MFA 10, MFCA 10	150	No
9074	2021-11-17 09:54:17	Norway	4	no disclosure (confidentiality)	200	5	2	0	1	0	0	1	0		3															not sure	200	No
9078	2021-11-17 10:16:20	Germany	1	no disclosure (confidentiality)	20	2	1	0	1	0	0	0	0		1		8	8	8	8	8	0				60	50				150	No
9083	2021-11-17 10:51:26	Netherlands	2	no disclosure (confidentiality)	45	1	1	0	0	0	1	0	0		4															Sorry but this impossible and too demanding to specify. My course is 10 ECTS and students attend a full week of theory lectures and related practical assignments first, and next propose and perform a full fledged LCA case study, fulfilling specified modelling and reporting requirements and this report is finally evaluated by designated LCA expert-teachers	280	No
9107	2021-11-17 16:48:34	Sweden	2	no disclosure (confidentiality)	50	5	3	1	1	0	0	1	0		2		8	8	40	8	8	8	8	8	29	29	8	29	29		200	No
9109	2021-11-17 17:02:05	Germany	5	no disclosure (confidentiality)	100	2	3	1	1	1	0	0	0		3																360	No
9115	2021-11-17 17:52:20	Germany	2	no disclosure (confidentiality)	80	5	2	1	1	0	0	0	0		3		4	4	6	6	6	4	4	4		8		12	12		70	No
9239	2021-11-18 09:16:06	Japan	2	no disclosure (confidentiality)	10	1	1	0	1	0	0	0	0		2		1	2	4	2	2	0	0	0	10	0	0	0	0	LCC, SLCA, LCSA 4	1	Yes
9287	2021-11-18 17:28:53	Switzerland	5	no disclosure (confidentiality)	20	2	1	0	0	0	1	0	0		4																50	No
9296	2021-11-18 19:21:26	Germany	2	no disclosure (confidentiality)	100	3	2	1	1	0	0	0	0		3																30	No
9391	2021-11-19 17:17:14	France	2	no disclosure (confidentiality)	100	4	1	0	1	0	0	0	0		3																60	No
9677	2021-11-22 15:30:37	Germany	1	no disclosure (confidentiality)	30	2	2	0	1	1	0	0	0		2		20	20	10	20	20					40		20			150	No
9696	2021-11-22 20:32:22	United States	1	no disclosure (confidentiality)	30	2	3	1	1	0	0	1	0		2		10	15	15	10	5	2	5	2	30	20	20	5	20		75	No
9701	2021-11-22 22:02:52	Italia	1	no disclosure (confidentiality)	15	1	1	0	1	0	0	0	0		3																	No
9945	2021-11-25 06:40:01	Hungary	5	no disclosure (confidentiality)	30	2	1	0	1	0	0	0	0		2		3	3	3	3					3	21		6			42	No
10301	2021-11-27 17:06:27	Denmark	2	no disclosure (confidentiality)	250	7	4	1	1	1	0	1	0		6	it is not a study program, but depending on all available LCA-related courses on campus, students can fulfill any of the 5 above levels	4	1	4	6	4	8	7	4		140		140			280	No
10596	2021-11-29 19:48:17	Spain	1	no disclosure (confidentiality)	75	1	1	0	1	0	0	0	0		2		0.5	1	1	0.5	1				1						5	No
10681	2021-11-30 10:25:44	Belgium	5	no disclosure (confidentiality)	350	2	3	1	1	0	0	1	0		2																	No
10683	2021-11-30 10:29:27	Spain	1	no disclosure (confidentiality)	50	1	1	1	0	0	0	0	0		1		2	2	6	4	1	2	1	2	1	4	8	2			28	Yes
10684	2021-11-30 10:35:48	Spain	2	no disclosure (confidentiality)	25	3	1	0	1	0	0	0	0		3		5	5	10	10	2				5	5	5	8	5		60,00	Yes
10688	2021-11-30 10:48:19	Czech Republic	2	no disclosure (confidentiality)	30	1	2	1	1	0	0	0	0		2		4	1	8	20	4	1	0	0	16	8	16	0	0		40	No
10699	2021-11-30 11:37:41	India	5	no disclosure (confidentiality)	20	4	1	0	1	0	0	0	0		2		4	2	4	2	2				2		2		2		20	No
10704	2021-11-30 11:43:54	Japan	1	no disclosure (confidentiality)	6	5	2	1	0	1	0	0	0		2																21	No
10729	2021-11-30 13:59:43	United States	1	no disclosure (confidentiality)	50	1	1	0	1	0	0	0	0		2																25	Yes
10735	2021-11-30 14:22:31	United Kingdom	5	no disclosure (confidentiality)	120	3	1	0	1	0	0	0	0		3																120	No
10771	2021-11-30 17:52:17	Germany	2	no disclosure (confidentiality)	30	2	1	0	1	0	0	0	0		6	Full development of a Social LCA	1	1	2	4	1			2	2	12			0.5		24	No
10780	2021-11-30 18:35:57	Spain	2	no disclosure (confidentiality)	10	1	1	0	1	0	0	0	0		2		1	1	2	1	0	1	2	1	4	4	2	4	1		24	No
10837	2021-12-01 02:25:33	Argentina	1	no disclosure (confidentiality)	20	2	2	1	0	1	0	0	0		1		4	4	8	4	2	2	2	4	2	6	2	0	0		40	No
10876	2021-12-01 05:30:22	Japan	1	no disclosure (confidentiality)	100	1	1	1	0	0	0	0	0		1		2		12			1		1							6	No
10943	2021-12-01 11:12:48	United Kingdom	1	no disclosure (confidentiality)	120	1	1	1	0	0	0	0	0		2		1	1	2	1	1				1	12	4					No
11025	2021-12-01 16:29:27	Denmark	5	no disclosure (confidentiality)	250	5	2	1	1	0	0	0	0		5																200	No
11034	2021-12-01 17:06:08	Denmark	2	no disclosure (confidentiality)	25	4	1	0	0	0	1	0	0		4		2	2	8	2	10	5	15		10	80		20	2		145	Yes
11049	2021-12-01 17:45:28	Denmark	2	no disclosure (confidentiality)	35	6	1	0	1	0	0	0	0		5		10	10	10	10	15		10	10	5	10		20	10		120	Yes
11172	2021-12-02 09:40:45	United Kingdom	2	no disclosure (confidentiality)	70	5	2	1	0	0	0	1	0		4		0.5	0.5	1	0.5	0.5	0.25	0.25		2	15			2.5		25	No
11201	2021-12-02 13:19:54	France	5	no disclosure (confidentiality)	260	6	5	1	1	1	1	1	0		6	all the propositions are true, depends on the course and application														N/A the workload depends on the course and varies from 9 hours to 45 hours		No
11203	2021-12-02 13:58:09	Finland	2	no disclosure (confidentiality)	47	3	1	0	1	0	0	0	0		3		2	2	2	2	2	2	0	2	10	50		50	20	6	150	No
11247	2021-12-02 17:56:19	Germany	1	no disclosure (confidentiality)	20	1	1	0	1	0	0	0	0		2																180	Yes
11338	2021-12-03 06:01:43	Japan	1	no disclosure (confidentiality)	100	1	1	0	1	0	0	0	0		1																15	Yes
11417	2021-12-03 17:01:06	Austria	2	no disclosure (confidentiality)	8	2	1	0	1	0	0	0	0		3		2	2		2	2	2				30		30	5		75	No
11597	2021-12-04 19:48:17	Portugal	4	no disclosure (confidentiality)	30	1	2	1	1	0	0	0	0		2		3	3	3	3	2	2			4	6		10	2		40	No
11883	2021-12-06 15:28:58	Peru	5	no disclosure (confidentiality)	100	4	1	0	1	0	0	0	0		3		2	2	3	4	2	1	9	1	3	2		16	3		48	No
12074	2021-12-07 16:19:36	Ireland	2	no disclosure (confidentiality)	50	1	1	0	1	0	0	0	0		3		6	4	10	6	10	10	0	0		104	12	16	4	18	200	No
13013	2021-12-14 04:30:15	Australia	1	no disclosure (confidentiality)	160	2	1	1	0	0	0	0	0		2		2	1	0.5	0.5	0.5	0	0	0	1	0	0	0	0	0	6	Yes
13053	2021-12-14 10:21:37	Australia	2	no disclosure (confidentiality)	150	2	1	1	0	0	0	0	0		2		1	1	1	1						8		8			20	No
13118	2021-12-14 20:45:43	New Zealand	2	no disclosure (confidentiality)	10	1	1	1	0	0	0	0	0		6	Comprehension of LCA methodology and essentials of LCA studies; application of specific methodological steps of LCA AND design and conduct of a streamlined LCA study, including consideration (not full analysis and evaluation) of data quality and reliability.															25	No
14294	2021-12-24 08:15:31	China (People's Republic of China)	1	no disclosure (confidentiality)	50	1	1	0	1	0	0	0	0		3		2	4	4	4	2				2	2	2	4	4		30	No
37	2021-09-06 19:50:24		5	no disclosure (confidentiality)	40	2	1	1	0	0	0	0	0		2		40	1													40	No
56	2021-09-07 03:03:14		2	no disclosure (confidentiality)	30	1	1	1	0	0	0	0	0		1																1	No
76	2021-09-07 15:30:43	Jakarta	2	no disclosure (confidentiality)		1	1	1	0	0	0	0	0		4		0.5	1.5	2	2	2	0.5	1	0	2	3	0.5	3	1		24	No
232	2021-09-15 17:41:44	France	2	no disclosure (confidentiality)	20	2	1	0	1	0	0	0	0		3				4	2	2				8	12		2			30	No
240	2021-09-15 18:31:32	Mexico	2	no disclosure (confidentiality)	10	2	2	1	1	0	0	0	0		2		6	8	8	6	4		6			18			8		64	No
299	2021-09-16 03:35:18		1	no disclosure (confidentiality)	350	2	1	0	1	0	0	0	0		3		6	20	30	6	6	6	0	0	0	30	0	20	6		120	No
582	2021-09-20 10:19:41		2	no disclosure (confidentiality)	300	5	2	0	1	1	0	0	0		2		10	15	10	5		10							30		80	No
608	2021-09-20 14:32:48		2	no disclosure (confidentiality)	25	1	1	0	1	0	0	0	0		3		3	3	15	3	2	0	0	0	10	0	0	5	2		42	Yes
884	2021-09-22 10:43:57	Spain	5	no disclosure (confidentiality)	200	2	5	1	1	1	1	1	0		2		10	10	30	10	5	0	0	10	20	25	0	0	20		140	Yes
8142	2021-11-11 18:41:10		1	no disclosure (confidentiality)	23	1	1	0	1	0	0	0	0		3		1.5	1.5	3	3	1.5	0	3	1.5	0	6	1.5	1.5	1.5	1.5 hours ecodesign and 1.5 ecoefficiency, 1.5 Functional unit	30	No
8778	2021-11-16 10:35:55	Spain	2	no disclosure (confidentiality)	15	2	1	0	1	0	0	0	0		2		10	2	3	1	1	1	0	0	10	0	2	0	0		30	No
8782	2021-11-16 10:58:46	France	2	no disclosure (confidentiality)	150	2	1	0	1	0	0	0	0		3		1	1	1	1				1	7		3				15	Yes
8784	2021-11-16 11:03:09		2	no disclosure (confidentiality)	100	1	1	0	0	1	0	0	0		1		1	1	1	1	0.5				2						6.5	No
8803	2021-11-16 12:13:36		2	no disclosure (confidentiality)	6	2	1	0	0	0	0	1	0		3					50											10	Yes
8950	2021-11-16 21:01:01	Brazil	2	no disclosure (confidentiality)	15	1	1	0	1	0	0	0	0		1		10	5	1	1	1	0	0	1	1	2	0	0	2		24	Yes
8958	2021-11-16 22:00:38		2	no disclosure (confidentiality)	20	2	1	0	1	0	0	0	0		2		4	2	4	4	2	2	5	1	4	8		8	2		48	No
9070	2021-11-17 09:53:41		5	no disclosure (confidentiality)	24	2	1	0	1	0	0	0	0		4		10	10	10	10	10	2	0	0	40	40	20	40	40		10	No
9128	2021-11-17 20:05:52		2	no disclosure (confidentiality)	10	1	1	1	0	0	0	0	0		1		1	1													2	No
9275	2021-11-18 15:38:09		1	no disclosure (confidentiality)	120	1	1	1	0	0	0	0	0		2		4	8	12	2	2	3	2	3	10	15	2	6	2		64	Yes
9307	2021-11-19 00:12:12		2	no disclosure (confidentiality)	25	1	1	1	0	0	0	0	0		1																10	Yes
9800	2021-11-23 21:56:06		2	no disclosure (confidentiality)	8	2	1	0	1	0	0	0	0		4		4	2	2	2	2					60		40	5	3	120	Yes
9824	2021-11-24 03:37:28		2	no disclosure (confidentiality)	50	1	1	0	1	0	0	0	0		2																170	No
10054	2021-11-25 23:08:06		1	no disclosure (confidentiality)	25	2	1	1	0	0	0	0	0		3		1	1	5	1	1	1	0	1	5	10	0	15	15		50	No
10810	2021-11-30 21:12:08	Thailand	5	no disclosure (confidentiality)	80	4	1	0	1	0	0	0	0		3																150	Yes
10948	2021-12-01 11:57:57		5	no disclosure (confidentiality)	40	2	2	0	1	0	0	1	0		3																	No
11033	2021-12-01 16:50:40		5	no disclosure (confidentiality)	75	1	2	0	1	0	0	0	1	as stated I can only answer for a course - not for study programme	1											100	20				120	No
11041	2021-12-01 17:09:35		2	no disclosure (confidentiality)	42	1	1	0	1	0	0	0	0		1																24	Yes
11184	2021-12-02 12:00:16		5	no disclosure (confidentiality)	10	1	1	1	0	0	0	0	0		1		1	1	4	2	2	1		1	2	4	1	1			20	No
11378	2021-12-03 11:01:26		2	no disclosure (confidentiality)	120	2	1	0	0	1	0	0	0		2		5	5	25	15											50	No
11421	2021-12-03 17:34:39		1	no disclosure (confidentiality)	20	3	3	1	1	0	1	0	0		2																350	Yes
11895	2021-12-06 17:25:08		2	no disclosure (confidentiality)	25	1	1	0	1	0	0	0	0		2																48	No
12195	2021-12-08 08:25:56		2	no disclosure (confidentiality)	15	3	2	0	1	0	0	1	0		2		2	2	4	4	2	2	8	4	4	4	4	4	4		160	No
12591	2021-12-10 23:20:57		5	no disclosure (confidentiality)	500	2	2	0	1	0	0	1	0		2																30	No
13008	2021-12-14 04:02:17		5	no disclosure (confidentiality)	60	1	2	0	1	1	0	0	0		3		4	4	12	12	12	4	2	4	16	16	0	4	4		150	No
13192	2021-12-15 09:16:28	Algeria	2	no disclosure (confidentiality)	18	1	1	0	1	0	0	0	0		3		1.5	1.5	3	3	6	3	3	3	3	3		12			45	No
13491	2021-12-17 14:42:01		1	no disclosure (confidentiality)	60	2	3	1	0	1	0	1	0		2		1	2	4	1	1										18	No
155	2021-09-13 15:43:56	South Africa	2	no disclosure (confidentiality)	60	1	1	1	0	0	0	0	0		3		2	2	2	2			1		2		1				12	No
325	2021-09-16 08:29:12	Switzerland	1	no disclosure (confidentiality)	35	2	1	0	1	0	0	0	0		2		2	1	0.5	1				1	2		2				10	Yes
345	2021-09-16 11:47:49	Switzerland	1	no disclosure (confidentiality)	50	1	1	1	0	0	0	0	0		1		5	5													10	No
358	2021-09-16 14:56:26	Sweden	2	no disclosure (confidentiality)	25	2	1	1	0	0	0	0	0		3		20	20	20	20	20										100	No
359	2021-09-16 16:54:03	Italia	4	no disclosure (confidentiality)	20	8	1	0	1	0	0	0	0		2																70	No
366	2021-09-16 19:35:44	Canada	2	no disclosure (confidentiality)	25	1	1	0	1	0	0	0	0		3		6	6	12	12	12	3	0.5	3	0	40	0	3	1		200	No
438	2021-09-16 22:33:45	United Kingdom	2	no disclosure (confidentiality)	45	2	1	1	0	0	0	0	0		2		8	3								10	5				25	No
513	2021-09-17 13:54:35	Italia	2	no disclosure (confidentiality)	25	1	1	0	1	0	0	0	0		2		4	2	2	4	1	1	2	2	2	2		2			24	No
606	2021-09-20 14:21:51	Pakistan	2	no disclosure (confidentiality)	30	1	1	0	0	0	0	1	0		2																	Yes
1053	2021-09-23 17:34:20	Portugal	2	no disclosure (confidentiality)	25	1	1	1	0	0	0	0	0		1										10						10	No
5275	2021-10-25 13:57:49	Spain	5	no disclosure (confidentiality)	19	1	1	1	0	0	0	0	0		1		1		0.5	0.5											2	No
8288	2021-11-12 14:57:07	Denmark	2	no disclosure (confidentiality)	35	1	1	1	0	0	0	0	0		2		0.5	0.5	1	1	0.5	0.5	0	0	0	0		0	4		8	Yes
8775	2021-11-16 10:30:15	France	2	no disclosure (confidentiality)	10	1	1	1	0	0	0	0	0		1		0.5	0.5	0.5	0.5	0.5	0	0	0	1	3	0	1	0.5		8	No
8823	2021-11-16 13:20:47	Italia	1	no disclosure (confidentiality)	30	2	1	0	1	0	0	0	0		1		2	2	2				2	2	2						12	Yes
8842	2021-11-16 15:08:19	United States	2	no disclosure (confidentiality)	6	1	2	0	1	0	0	1	0		4		5	20	30	10	5	2	2	3	2	30	2	40	40		60	No
8921	2021-11-16 19:01:23	Germany	2	no disclosure (confidentiality)	24	4	1	0	0	0	1	0	0		4		20	20	50	70	30	30	40	30	50	150	30	120	70	average thesis LCA content 400	1200	Yes
8941	2021-11-16 19:57:19	Netherlands	4	no disclosure (confidentiality)	40	4	1	0	1	0	0	0	0		5				60	60											120	No
8953	2021-11-16 21:14:25	Germany	1	no disclosure (confidentiality)	25	1	1	0	0	0	0	1	0		2		10	10	50	10	10	10				40		40			180	No
9239	2021-11-18 09:16:06	Japan	1	no disclosure (confidentiality)	30	3	1	0	1	0	0	0	0		1			2	2	2			4	10	0	0	0	0	0	LCC, SLCA, LCSA 2	4	No
10683	2021-11-30 10:29:27	Spain	2	no disclosure (confidentiality)	8	1	1	1	0	0	0	0	0		1		1	1		1		1							6		10	No
10684	2021-11-30 10:35:48	Spain	2	no disclosure (confidentiality)	20	1	1	1	0	0	0	0	0		2																2	No
10729	2021-11-30 13:59:43	United States	5	no disclosure (confidentiality)	50	1	1	1	0	0	0	0	0		1																2	No
11034	2021-12-01 17:06:08	Denmark	4	no disclosure (confidentiality)	30	4	1	0	1	0	0	0	0		3		2	2	8	2	5	2	20			30		10			70	No
11049	2021-12-01 17:45:28	Denmark	4	no disclosure (confidentiality)	35	6	1	0	1	0	0	0	0		5		10	10	10	10	15	15	10	5	5	10		10	10		120	No
11247	2021-12-02 17:56:19	Germany	2	no disclosure (confidentiality)	15	1	1	0	1	0	0	0	0		3																180	Yes
11338	2021-12-03 06:01:43	Japan	2	no disclosure (confidentiality)	20	1	1	0	1	0	0	0	0		2								15								30	No
13013	2021-12-14 04:30:15	Australia	2	no disclosure (confidentiality)	150	3	1	1	0	0	0	0	0		2		3	1	1						1	1					7	No
608	2021-09-20 14:32:48		4	no disclosure (confidentiality)	30	4	2	0	1	0	0	1	0		5		2	2	20	10	10	2	0	0	10	0	0	10	5		71	No
884	2021-09-22 10:43:57		1	no disclosure (confidentiality)			1	0	1	0	0	0	0		2		2	5	5	5	0	0	0	0	10	18			15		60	No
8782	2021-11-16 10:58:46	France	2	no disclosure (confidentiality)	30	2	1	0	1	0	0	0	0		3		1	1	1	1					14		2				20	Yes
8803	2021-11-16 12:13:36		1	no disclosure (confidentiality)	5	2	1	0	0	0	1	0	0		3					50						12	10				20	Yes
8950	2021-11-16 21:01:01	Brazil	1	no disclosure (confidentiality)	50	1	1	1	0	0	0	0	0		1		1	1	1	1											4	No
9275	2021-11-18 15:38:09		2	no disclosure (confidentiality)	20	1	1	1	0	0	0	0	0		3		10	6	4	4	2	2	1	2	6	20	2	2	2		64	No
9307	2021-11-19 00:12:12		2	no disclosure (confidentiality)	10	1	1	1	0	0	0	0	0		1																10	No
9800	2021-11-23 21:56:06		1	no disclosure (confidentiality)	20	1	1	1	0	0	0	0	0		1		1		1	1											3	No
10810	2021-11-30 21:12:08	Thailand	5	no disclosure (confidentiality)	250	4	1	0	1	0	0	0	0		2																150	No
11041	2021-12-01 17:09:35		2	no disclosure (confidentiality)	45	1	1	0	1	0	0	0	0		1																24	Yes
11421	2021-12-03 17:34:39		2	no disclosure (confidentiality)	20	2	3	1	1	1	0	0	0		3																150	No
325	2021-09-16 08:29:12	Switzerland	2	no disclosure (confidentiality)	20	1	1	1	0	0	0	0	0		1		1	1	1	1	1				1		2			3	11	No
606	2021-09-20 14:21:51	Pakistan	4	no disclosure (confidentiality)	10	1	1	0	0	0	0	1	0		4		3	3	3	3	3	3	3	3	3	3	3	3	3		3	No
8288	2021-11-12 14:57:07	Denmark	2	no disclosure (confidentiality)	40	1	1	1	0	0	0	0	0		1		0.5	0.5	0.5	0.5	0.5			0.5	1						4	No
8823	2021-11-16 13:20:47	Italia	2	no disclosure (confidentiality)	15	2	1	0	0	0	1	0	0		2		1	1	1	1	1		1		3	3	3				15	Yes
8921	2021-11-16 19:01:23	Germany	2	no disclosure (confidentiality)	40	1	1	1	0	0	0	0	0		1		5	1		3			2	2							12	No
11247	2021-12-02 17:56:19	Germany	2	no disclosure (confidentiality)	40	2	1	1	0	0	0	0	0		1																90	No
8782	2021-11-16 10:58:46	France	2	no disclosure (confidentiality)	30	2	1	0	0	1	0	0	0		4																40	No
8803	2021-11-16 12:13:36		2	no disclosure (confidentiality)	6	2	1	0	1	0	0	0	0		2				50												12	Yes
11041	2021-12-01 17:09:35		2	no disclosure (confidentiality)	45	1	1	0	1	0	0	0	0		1																24	Yes
8823	2021-11-16 13:20:47	Italia	4	no disclosure (confidentiality)	6	1	1	0	1	0	0	0	0		3		1	1	1	1	1		1		3	3	3				15	No
8803	2021-11-16 12:13:36		2	no disclosure (confidentiality)	6	2	1	0	0	1	0	0	0		3					25											30	No
11041	2021-12-01 17:09:35		2	no disclosure (confidentiality)	45	1	1	0	1	0	0	0	0		1																24	No

## Sheet: ANSWER CODES
VAR	MEANING	RESPONSE
OI01	Yes. I have been teaching LCA in the last 2 years.	1
OI01	Yes. Teaching is provided by other lecturers. (Please kindly forward our survey to colleagues who are teaching LCA. Your support is highly appreciated.)	3
OI01	No	2
OI01	not answered	-9
OI06	Yes	1
OI06	No	2
OI06	not answered	-9
OI04	Less than 5000 students	1
OI04	5000 - 10k students	2
OI04	10k - 15k students	3
OI04	Greater than 15k students	4
OI04	not answered	-9
OI11	[1]	1
OI11	Prefer not to say [2]	2
OI11	not answered	-9
OI10	Afghanestan	4
OI10	Albania	8
OI10	Antarctic	10
OI10	Algeria	12
OI10	American Samoa	16
OI10	Andorra	20
OI10	Angola	24
OI10	Anguilla	660
OI10	Antigua and Barbuda	28
OI10	Argentina	32
OI10	Armenia	51
OI10	Aruba	533
OI10	Australia	36
OI10	Austria	40
OI10	Azerbaijan	31
OI10	Bahamas	44
OI10	Bahrain	48
OI10	Bangladesch	50
OI10	Barbados	52
OI10	Belarus	112
OI10	Belgium	56
OI10	Åland Islands	248
OI10	Belize	84
OI10	Benin	204
OI10	Bermuda	60
OI10	Bhutan	64
OI10	Bolivia	68
OI10	Caribbean Netherlands	535
OI10	Bosnia and Herzegovina	70
OI10	Botswana	72
OI10	Brasil	76
OI10	Bouvet Islands	74
OI10	British Virgin Islands	92
OI10	Brunei	96
OI10	British Indian Ocean Territory	86
OI10	Bulgaria	100
OI10	Burkina Faso	854
OI10	Burma	104
OI10	Burundi	108
OI10	Cambodia	116
OI10	Cameroons	120
OI10	Canada	124
OI10	Cape Verde	132
OI10	Cayman Islands	136
OI10	Central African Republic	140
OI10	Chad	148
OI10	Chile	152
OI10	China (People's Republic of China)	156
OI10	Christmas Island	162
OI10	Cocos Islands	166
OI10	Colombia	170
OI10	Comoros	174
OI10	Republic of the Congo	178
OI10	Democratic Republic of the Congo	180
OI10	Cook Islands	184
OI10	Costa Rica	188
OI10	Côte d'Ivoire	384
OI10	Croatia	191
OI10	Cuba	192
OI10	Curaçao	531
OI10	Cyprus	196
OI10	Czech Republic	203
OI10	Denmark	208
OI10	Djibouti	262
OI10	Dominica	212
OI10	Dominican Republic	214
OI10	East Timor	626
OI10	Ecuador	218
OI10	Egypt	818
OI10	El Salvador	222
OI10	Equatorial Guinea	226
OI10	Eritrea	232
OI10	Estonia	233
OI10	Ethiopia	231
OI10	Falkland Islands	238
OI10	Faroe Islands	234
OI10	Federated States of Micronesia	583
OI10	Fiji	242
OI10	Finland	246
OI10	France	250
OI10	French Guiana	254
OI10	French Polynesia	258
OI10	French Southern Territories	260
OI10	Gabon	266
OI10	Gambia	270
OI10	Georgia	268
OI10	Germany	276
OI10	Ghana	288
OI10	Gibraltar	292
OI10	Greece	300
OI10	Greenland	304
OI10	Grenada	308
OI10	Guadeloupe	312
OI10	Guam	316
OI10	Guatemala	320
OI10	Guernsey	831
OI10	Guinea	324
OI10	Guinea-Bissau	624
OI10	Guyana	328
OI10	Haiti	332
OI10	Heard and McDonald Islands	334
OI10	Vatican City	336
OI10	Honduras	340
OI10	Hong Kong	344
OI10	Hungary	348
OI10	Iceland	352
OI10	India	356
OI10	Indonesia	360
OI10	Iran	364
OI10	Iraq	368
OI10	Ireland	372
OI10	Isle of Man	833
OI10	Israel	376
OI10	Italia	380
OI10	Jamaica	388
OI10	Japan	392
OI10	Jersey	832
OI10	Jordan	400
OI10	Kazakhstan	398
OI10	Kenya	404
OI10	Kiribati	296
OI10	North Korea	408
OI10	South Korea	410
OI10	Kosovo	1002
OI10	Kuwait	414
OI10	Kyrgyzstan	417
OI10	Laos	418
OI10	Latvia	428
OI10	Lebanon	422
OI10	Lesotho	426
OI10	Liberia	430
OI10	Libya	434
OI10	Liechtenstein	438
OI10	Lithuania	440
OI10	Luxembourg	442
OI10	Macao	446
OI10	Macedonia	807
OI10	Madagascar	450
OI10	Malawi	454
OI10	Malaysia	458
OI10	Maldives	462
OI10	Mali	466
OI10	Malta	470
OI10	Marshall Islands	584
OI10	Martinique	474
OI10	Mauritania	478
OI10	Mauritius	480
OI10	Mayotte	175
OI10	México	484
OI10	Moldova	498
OI10	Monaco	492
OI10	Mongolia	496
OI10	Montenegro	499
OI10	Montserrat	500
OI10	Morocco	504
OI10	Mozambique	508
OI10	Namibia	516
OI10	Nauru	520
OI10	Nepal	524
OI10	Netherlands	528
OI10	New Caledonia	540
OI10	New Zealand	554
OI10	Nicaragua	558
OI10	Niger	562
OI10	Nigeria	566
OI10	Niue	570
OI10	Norfolk Island	574
OI10	Northern Mariana Islands	580
OI10	Northern Cyprus	1003
OI10	Norway	578
OI10	Oman	512
OI10	Pakistan	586
OI10	Palau	585
OI10	Palestine	275
OI10	Panama	591
OI10	Papua New Guinea	598
OI10	Paraguay	600
OI10	Peru	604
OI10	Philippines	608
OI10	Pitcairn Islands	612
OI10	Poland	616
OI10	Portugal	620
OI10	Puerto Rico	630
OI10	Qatar	634
OI10	Réunion	638
OI10	Romania	642
OI10	Russia	643
OI10	Rwanda	646
OI10	Saint Barthélemy	652
OI10	St. Helena, Ascension und Tristan da Cunha	654
OI10	St. Kitts und Nevis	659
OI10	St. Lucia	662
OI10	Sankt Martin	663
OI10	Saint-Pierre and Miquelon	666
OI10	St. Vincent and the Grenadines	670
OI10	Samoa	882
OI10	San Marino	674
OI10	São Tomé und Príncipe	678
OI10	Saudi Arabia	682
OI10	Senegal	686
OI10	Serbia	688
OI10	Seychelles	690
OI10	Sierra Leone	694
OI10	Singapore	702
OI10	Sint Maarten	534
OI10	Slovakia	703
OI10	Slovenia	705
OI10	Solomon Islands	90
OI10	Somalia	706
OI10	South Africa	710
OI10	South Georgia and the South Sandwich Islands	239
OI10	South Ossetia	1004
OI10	South Sudan	728
OI10	Spain	724
OI10	Sri Lanka	144
OI10	Sudan	729
OI10	Suriname	740
OI10	Svalbard	744
OI10	Swaziland	748
OI10	Sweden	752
OI10	Switzerland	756
OI10	Syria	760
OI10	Taiwan	158
OI10	Tajikistan	762
OI10	Tanzania	834
OI10	Thailand	764
OI10	Togo	768
OI10	Tokelau	772
OI10	Tonga	776
OI10	Trinidad and Tobago	780
OI10	Tunesia	788
OI10	Turkey	792
OI10	Turkmenistan	795
OI10	Turks and Caicos Islands	796
OI10	Tuvalu	798
OI10	Uganda	800
OI10	Ukraine	804
OI10	United Arab Emirates	784
OI10	United Kingdom	826
OI10	United States	840
OI10	United States Minor Outlying Islands	581
OI10	Uruguay	858
OI10	Uzbekistan	860
OI10	Vanuatu	548
OI10	Venezuela	862
OI10	Vietnam	704
OI10	United States Virgin Islands	850
OI10	Wallis und Futuna	876
OI10	Western Sahara	732
OI10	Yemen	887
OI10	Zambia	894
OI10	Zimbabwe	716
OI10	other text input	-2
OI10	not answered	-9
OI16	I agree to participate in the research study. I understand the purpose and nature of this study and I am participating voluntarily. I understand that I can withdraw from the study at any time, without any penalty or consequences.	1
OI16	not answered	-9
OI18	Professor / Senior lecturer	1
OI18	Senior reseacher / Post-doc	2
OI18	Junior researcher/ PhD	3
OI18	Others	4
OI18	Academic	5
OI18	Consultant	6
OI18	Industry employee	7
OI18	Others	8
OI18	not answered	-9
E002	Yes, I want my institution to be included in the public directory.	1
E002	No, please do not use the information I provided.	2
E002	not answered	-9
TI01	Less than 2 years	1
TI01	More than 2 years but less than 5 years	2
TI01	More than 5 years but less than 10 years	3
TI01	More than 10 years	4
TI01	not answered	-9
TI02	Less than 2 years	1
TI02	More than 2 years but less than 5 years	2
TI02	More than 5 years but less than 10 years	3
TI02	More than 10 years	4
TI02	not answered	-9
TI04	I am exclusively responsible for the development of the taught content	1
TI04	I am partially responsible for the development of the taught content	2
TI04	I am not responsible for the taught content	3
TI04	not answered	-9
TI05	Yes. Please kindly forward our survey to colleagues who are teaching LCA. Your support is highly appreciated.	1
TI05	No	2
TI05	Don’t know	-1
TI05	not answered	-9
TI06x01	not selected	1
TI06x01	selected	2
TI06x11	not selected	1
TI06x11	selected	2
TI06x12	not selected	1
TI06x12	selected	2
TI06x13	not selected	1
TI06x13	selected	2
TI06x14	not selected	1
TI06x14	selected	2
TI06x15	not selected	1
TI06x15	selected	2
TI06x16	not selected	1
TI06x16	selected	2
TI06x17	not selected	1
TI06x17	selected	2
TI06x18	not selected	1
TI06x18	selected	2
TI06x19	not selected	1
TI06x19	selected	2
TI06x20	not selected	1
TI06x20	selected	2
TI06x21	not selected	1
TI06x21	selected	2
TI06x22	not selected	1
TI06x22	selected	2
TI06x23	not selected	1
TI06x23	selected	2
TI06x02	not selected	1
TI06x02	selected	2
TI06x211	not selected	1
TI06x211	selected	2
TI06x222	not selected	1
TI06x222	selected	2
TI06x03	not selected	1
TI06x03	selected	2
TI06x31	not selected	1
TI06x31	selected	2
TI06x32	not selected	1
TI06x32	selected	2
TI06x33	not selected	1
TI06x33	selected	2
TI06x04	not selected	1
TI06x04	selected	2
TI06x41	not selected	1
TI06x41	selected	2
TI06x42	not selected	1
TI06x42	selected	2
TI06x43	not selected	1
TI06x43	selected	2
TI06x44	not selected	1
TI06x44	selected	2
TI06x45	not selected	1
TI06x45	selected	2
TI06x46	not selected	1
TI06x46	selected	2
TI06x47	not selected	1
TI06x47	selected	2
TI06x48	not selected	1
TI06x48	selected	2
TI06x49	not selected	1
TI06x49	selected	2
TI06x50	not selected	1
TI06x50	selected	2
TI06x51	not selected	1
TI06x51	selected	2
TI07x01	not selected	1
TI07x01	selected	2
TI07x02	not selected	1
TI07x02	selected	2
TI07x03	not selected	1
TI07x03	selected	2
TI07x04	not selected	1
TI07x04	selected	2
TI07x05	not selected	1
TI07x05	selected	2
TI07x06	not selected	1
TI07x06	selected	2
TI07x07	not selected	1
TI07x07	selected	2
TI07x08	not selected	1
TI07x08	selected	2
TI07x09	not selected	1
TI07x09	selected	2
TI07x10	not selected	1
TI07x10	selected	2
TI07x11	not selected	1
TI07x11	selected	2
TI07x12	not selected	1
TI07x12	selected	2
TI07x13	not selected	1
TI07x13	selected	2
TI07x14	not selected	1
TI07x14	selected	2
TI07x15	not selected	1
TI07x15	selected	2
TI07x16	not selected	1
TI07x16	selected	2
TI09	Other	1
TI09	not answered	-9
TI10_01	not selected	1
TI10_01	selected	2
TI10_02	not selected	1
TI10_02	selected	2
TI10_03	not selected	1
TI10_03	selected	2
TI10_04	not selected	1
TI10_04	selected	2
TI10_05	not selected	1
TI10_05	selected	2
TI10_06	not selected	1
TI10_06	selected	2
TI10_07	not selected	1
TI10_07	selected	2
TI10_08	not selected	1
TI10_08	selected	2
TI10_11	not selected	1
TI10_11	selected	2
TI10_12	not selected	1
TI10_12	selected	2
TI10_10	not selected	1
TI10_10	selected	2
TI10_09	not selected	1
TI10_09	selected	2
SI10	Yes	1
SI10	No	2
SI10	not answered	-9
SI74	Yes	1
SI74	No	2
SI74	not answered	-9
SI75	Yes	1
SI75	No	2
SI75	not answered	-9
ES02_03	not selected	1
ES02_03	selected	2
ES02_10	not selected	1
ES02_10	selected	2
ES02_02	not selected	1
ES02_02	selected	2
ES02_06	not selected	1
ES02_06	selected	2
ES02_01	not selected	1
ES02_01	selected	2
ES02_07	not selected	1
ES02_07	selected	2
ES02_08	not selected	1
ES02_08	selected	2
ES02_13	not selected	1
ES02_13	selected	2
ES02_12	not selected	1
ES02_12	selected	2
ES03_02	not selected	1
ES03_02	selected	2
ES03_03	not selected	1
ES03_03	selected	2
ES03_04	not selected	1
ES03_04	selected	2
ES03_01	not selected	1
ES03_01	selected	2
ES03_05	not selected	1
ES03_05	selected	2
ES04_01	not selected	1
ES04_01	selected	2
ES04_02	not selected	1
ES04_02	selected	2
ES04_03	not selected	1
ES04_03	selected	2
ES04_04	not selected	1
ES04_04	selected	2
ES04_05	not selected	1
ES04_05	selected	2
ES04_06	not selected	1
ES04_06	selected	2
ES04_07	not selected	1
ES04_07	selected	2
ES04_08	not selected	1
ES04_08	selected	2
ES08	I understand that by clicking „Next“, I will submit the survey and will not be able to edit my input.	1
ES08	not answered	-9
LC01	Comprehension of the basic concept of life cycle thinking, its relevance and use in different contexts; awareness of standardized methodologies	1
LC01	Comprehension of LCA methodology and essentials of LCA studies; application of specific methodological steps of LCA	2
LC01	Design and partial conduct of a full-fledged LCA study, including analysing and evaluating the quality and reliability	3
LC01	Full performance of LCA studies with possibility to apply and implement specific method development	4
LC01	Advancement of LCA methods and development of LCA method extensions	5
LC01	Other	6
LC01	not answered	-9
LC02	Comprehension of the basic concept of life cycle thinking, its relevance and use in different contexts; awareness of standardized methodologies	1
LC02	Comprehension of LCA methodology and essentials of LCA studies; application of specific methodological steps of LCA	2
LC02	Design and partial conduct of a full-fledged LCA study, including analysing and evaluating the quality and reliability	3
LC02	Full performance of LCA studies with possibility to apply and implement specific method development	4
LC02	Advancement of LCA methods and development of LCA method extensions	5
LC02	Other	6
LC02	not answered	-9
LC03	Comprehension of the basic concept of life cycle thinking, its relevance and use in different contexts; awareness of standardized methodologies	1
LC03	Comprehension of LCA methodology and essentials of LCA studies; application of specific methodological steps of LCA	2
LC03	Design and partial conduct of a full-fledged LCA study, including analysing and evaluating the quality and reliability	3
LC03	Full performance of LCA studies with possibility to apply and implement specific method development	4
LC03	Advancement of LCA methods and development of LCA method extensions	5
LC03	Other	6
LC03	not answered	-9
LC04	Comprehension of the basic concept of life cycle thinking, its relevance and use in different contexts; awareness of standardized methodologies	1
LC04	Comprehension of LCA methodology and essentials of LCA studies; application of specific methodological steps of LCA	2
LC04	Design and partial conduct of a full-fledged LCA study, including analysing and evaluating the quality and reliability	3
LC04	Full performance of LCA studies with possibility to apply and implement specific method development	4
LC04	Advancement of LCA methods and development of LCA method extensions	5
LC04	Other	6
LC04	not answered	-9
LC05_01	not selected	1
LC05_01	selected	2
LC05_02	not selected	1
LC05_02	selected	2
LC05_03	not selected	1
LC05_03	selected	2
LC05_04	not selected	1
LC05_04	selected	2
LC05_05	not selected	1
LC05_05	selected	2
LC05_06	not selected	1
LC05_06	selected	2
LC06_01	not selected	1
LC06_01	selected	2
LC06_02	not selected	1
LC06_02	selected	2
LC06_03	not selected	1
LC06_03	selected	2
LC06_04	not selected	1
LC06_04	selected	2
LC06_05	not selected	1
LC06_05	selected	2
LC06_06	not selected	1
LC06_06	selected	2
LC07_01	not selected	1
LC07_01	selected	2
LC07_02	not selected	1
LC07_02	selected	2
LC07_03	not selected	1
LC07_03	selected	2
LC07_04	not selected	1
LC07_04	selected	2
LC07_05	not selected	1
LC07_05	selected	2
LC07_06	not selected	1
LC07_06	selected	2
LC08_01	not selected	1
LC08_01	selected	2
LC08_02	not selected	1
LC08_02	selected	2
LC08_03	not selected	1
LC08_03	selected	2
LC08_04	not selected	1
LC08_04	selected	2
LC08_05	not selected	1
LC08_05	selected	2
LC08_06	not selected	1
LC08_06	selected	2
LA01	Undergraduate (e.g. BSc, BEng)	1
LA01	Postgraduate (e.g. MSc, MBA, Postgraduate Certificate) (not PhD)	2
LA01	PhD	4
LA01	Open to all levels	5
LA01	not answered	-9
LA02	Undergraduate (e.g. BSc, BEng)	1
LA02	Postgraduate (e.g. MSc, MBA, Postgraduate Certificate) (not PhD)	2
LA02	PhD	4
LA02	Open to all levels	5
LA02	not answered	-9
LA03	Undergraduate (e.g. BSc, BEng)	1
LA03	Postgraduate (e.g. MSc, MBA, Postgraduate Certificate) (not PhD)	2
LA03	PhD	4
LA03	Open to all levels	5
LA03	not answered	-9
LA04	Undergraduate (e.g. BSc, BEng)	1
LA04	Postgraduate (e.g. MSc, MBA, Postgraduate Certificate) (not PhD)	2
LA04	PhD	4
LA04	Open to all levels	5
LA04	not answered	-9

## Sheet: VARIABLES
VAR	LABEL	TYPE	INPUT	QUESTION
CASE	Interview-Nummer (fortlaufend)	METRIC	SYSTEM
SERIAL	Seriennummer (sofern verwendet)	TEXT	SYSTEM
REF	Referenz (sofern im Link angegeben)	TEXT	SYSTEM
QUESTNNR	Fragebogen, der im Interview verwendet wurde	TEXT	SYSTEM
MODE	Interview-Modus	TEXT	SYSTEM
STARTED	Zeitpunkt zu dem das Interview begonnen hat (Europe/Berlin)	TIME	SYSTEM
E002	final permission	NOMINAL	SELECTION	The FSLCI aims to provide a public directory of where and what level of LCA is taught around the world, e.g. to make it easier for students to identify relevant study programs.
ES02	which software: Ausweichoption (negativ) oder Anzahl ausgewählter Optionen	METRIC	SYSTEM	Which software tools and/or packages (if any) do you use to teach LCA?
ES02_03	which software: Bilan Produit Ademe	DICHOTOMOUS	CHECKBOX	Which software tools and/or packages (if any) do you use to teach LCA?
ES02_10	which software: Brightway	DICHOTOMOUS	CHECKBOX	Which software tools and/or packages (if any) do you use to teach LCA?
ES02_02	which software: Easetech	DICHOTOMOUS	CHECKBOX	Which software tools and/or packages (if any) do you use to teach LCA?
ES02_06	which software: Gabi	DICHOTOMOUS	CHECKBOX	Which software tools and/or packages (if any) do you use to teach LCA?
ES02_01	which software: MS Excel	DICHOTOMOUS	CHECKBOX	Which software tools and/or packages (if any) do you use to teach LCA?
ES02_07	which software: OpenLCA	DICHOTOMOUS	CHECKBOX	Which software tools and/or packages (if any) do you use to teach LCA?
ES02_08	which software: SimaPro	DICHOTOMOUS	CHECKBOX	Which software tools and/or packages (if any) do you use to teach LCA?
ES02_13	which software: Umberto	DICHOTOMOUS	CHECKBOX	Which software tools and/or packages (if any) do you use to teach LCA?
ES02_12	which software: Other	DICHOTOMOUS	CHECKBOX	Which software tools and/or packages (if any) do you use to teach LCA?
ES02_12a	which software: Other (offene Eingabe)	TEXT	OPEN	Which software tools and/or packages (if any) do you use to teach LCA?
ES03	database: Ausweichoption (negativ) oder Anzahl ausgewählter Optionen	METRIC	SYSTEM	Which LCA databases (if any) do you use to teach LCA?
ES03_02	database: EcoInvent	DICHOTOMOUS	CHECKBOX	Which LCA databases (if any) do you use to teach LCA?
ES03_03	database: ELCD	DICHOTOMOUS	CHECKBOX	Which LCA databases (if any) do you use to teach LCA?
ES03_04	database: GaBi	DICHOTOMOUS	CHECKBOX	Which LCA databases (if any) do you use to teach LCA?
ES03_01	database: US EPA	DICHOTOMOUS	CHECKBOX	Which LCA databases (if any) do you use to teach LCA?
ES03_05	database: Other	DICHOTOMOUS	CHECKBOX	Which LCA databases (if any) do you use to teach LCA?
ES03_05a	database: Other (offene Eingabe)	TEXT	OPEN	Which LCA databases (if any) do you use to teach LCA?
ES04	choice of database: Ausweichoption (negativ) oder Anzahl ausgewählter Optionen	METRIC	SYSTEM	What criteria did you consider when selecting the software and/or databases for teaching LCA?
ES04_01	choice of database: Functionality	DICHOTOMOUS	CHECKBOX	What criteria did you consider when selecting the software and/or databases for teaching LCA?
ES04_02	choice of database: Performance	DICHOTOMOUS	CHECKBOX	What criteria did you consider when selecting the software and/or databases for teaching LCA?
ES04_03	choice of database: Cost	DICHOTOMOUS	CHECKBOX	What criteria did you consider when selecting the software and/or databases for teaching LCA?
ES04_04	choice of database: Availability	DICHOTOMOUS	CHECKBOX	What criteria did you consider when selecting the software and/or databases for teaching LCA?
ES04_05	choice of database: Accessibility	DICHOTOMOUS	CHECKBOX	What criteria did you consider when selecting the software and/or databases for teaching LCA?
ES04_06	choice of database: Licence already available	DICHOTOMOUS	CHECKBOX	What criteria did you consider when selecting the software and/or databases for teaching LCA?
ES04_07	choice of database: Familiarity	DICHOTOMOUS	CHECKBOX	What criteria did you consider when selecting the software and/or databases for teaching LCA?
ES04_08	choice of database: Other	DICHOTOMOUS	CHECKBOX	What criteria did you consider when selecting the software and/or databases for teaching LCA?
ES04_08a	choice of database: Other (offene Eingabe)	TEXT	OPEN	What criteria did you consider when selecting the software and/or databases for teaching LCA?
ES08	the End	NOMINAL	SELECTION
LA01	academic level 1	NOMINAL	SELECTION	At what academic level is the study program taught?
LA02	academic level 2	NOMINAL	SELECTION	At what academic level is the study program taught?
LA03	academic level 3	NOMINAL	SELECTION	At what academic level is the study program taught?
LA04	academic level 4	NOMINAL	SELECTION	At what academic level is the study program taught?
LC01	competency 1	NOMINAL	SELECTION	Considering the following statements, which best describes the level of LCA competency expected of students who complete the study program?
LC01_06	competency 1: Other	TEXT	OPEN	Considering the following statements, which best describes the level of LCA competency expected of students who complete the study program?
LC02	competency 2	NOMINAL	SELECTION	Considering the following statements, which best describes the level of LCA competency expected of students who complete the study program?
LC02_06	competency 2: Other	TEXT	OPEN	Considering the following statements, which best describes the level of LCA competency expected of students who complete the study program?
LC03	competency 3	NOMINAL	SELECTION	Considering the following statements, which best describes the level of LCA competency expected of students who complete the study program?
LC03_06	competency 3: Other	TEXT	OPEN	Considering the following statements, which best describes the level of LCA competency expected of students who complete the study program?
LC04	competency 4	NOMINAL	SELECTION	Considering the following statements, which best describes the level of LCA competency expected of students who complete the study program?
LC04_06	competency 4: Other	TEXT	OPEN	Considering the following statements, which best describes the level of LCA competency expected of students who complete the study program?
LC05	Integration 1: Ausweichoption (negativ) oder Anzahl ausgewählter Optionen	METRIC	SYSTEM	At what level is LCA content integrated into the study program?
LC05_01	Integration 1: Single lecture or short series of lectures (as part of a wider course, unit, or module)	DICHOTOMOUS	CHECKBOX	At what level is LCA content integrated into the study program?
LC05_02	Integration 1: Standalone module, unit, or course	DICHOTOMOUS	CHECKBOX	At what level is LCA content integrated into the study program?
LC05_03	Integration 1: Minor specialization (comprised of multiple modules, units, or courses)	DICHOTOMOUS	CHECKBOX	At what level is LCA content integrated into the study program?
LC05_04	Integration 1: Major specialization (comprised of multiple modules, units, or courses)	DICHOTOMOUS	CHECKBOX	At what level is LCA content integrated into the study program?
LC05_05	Integration 1: Research specialization	DICHOTOMOUS	CHECKBOX	At what level is LCA content integrated into the study program?
LC05_06	Integration 1: Other	DICHOTOMOUS	CHECKBOX	At what level is LCA content integrated into the study program?
LC05_06a	Integration 1: Other (offene Eingabe)	TEXT	OPEN	At what level is LCA content integrated into the study program?
LC06	Integration 2: Ausweichoption (negativ) oder Anzahl ausgewählter Optionen	METRIC	SYSTEM	At what level is LCA content integrated into the study program?
LC06_01	Integration 2: Single lecture or short series of lectures (as part of a wider course, unit, or module)	DICHOTOMOUS	CHECKBOX	At what level is LCA content integrated into the study program?
LC06_02	Integration 2: Standalone module, unit, or course	DICHOTOMOUS	CHECKBOX	At what level is LCA content integrated into the study program?
LC06_03	Integration 2: Minor specialization (comprised of multiple modules, units, or courses)	DICHOTOMOUS	CHECKBOX	At what level is LCA content integrated into the study program?
LC06_04	Integration 2: Major specialization (comprised of multiple modules, units, or courses)	DICHOTOMOUS	CHECKBOX	At what level is LCA content integrated into the study program?
LC06_05	Integration 2: Research specialization	DICHOTOMOUS	CHECKBOX	At what level is LCA content integrated into the study program?
LC06_06	Integration 2: Other	DICHOTOMOUS	CHECKBOX	At what level is LCA content integrated into the study program?
LC06_06a	Integration 2: Other (offene Eingabe)	TEXT	OPEN	At what level is LCA content integrated into the study program?
LC07	Integration 3: Ausweichoption (negativ) oder Anzahl ausgewählter Optionen	METRIC	SYSTEM	At what level is LCA content integrated into the study program?
LC07_01	Integration 3: Single lecture or short series of lectures (as part of a wider course, unit, or module)	DICHOTOMOUS	CHECKBOX	At what level is LCA content integrated into the study program?
LC07_02	Integration 3: Standalone module, unit, or course	DICHOTOMOUS	CHECKBOX	At what level is LCA content integrated into the study program?
LC07_03	Integration 3: Minor specialization (comprised of multiple modules, units, or courses)	DICHOTOMOUS	CHECKBOX	At what level is LCA content integrated into the study program?
LC07_04	Integration 3: Major specialization (comprised of multiple modules, units, or courses)	DICHOTOMOUS	CHECKBOX	At what level is LCA content integrated into the study program?
LC07_05	Integration 3: Research specialization	DICHOTOMOUS	CHECKBOX	At what level is LCA content integrated into the study program?
LC07_06	Integration 3: Other	DICHOTOMOUS	CHECKBOX	At what level is LCA content integrated into the study program?
LC07_06a	Integration 3: Other (offene Eingabe)	TEXT	OPEN	At what level is LCA content integrated into the study program?
LC08	Integration 4: Ausweichoption (negativ) oder Anzahl ausgewählter Optionen	METRIC	SYSTEM	At what level is LCA content integrated into the study program?
LC08_01	Integration 4: Single lecture or short series of lectures (as part of a wider course, unit, or module)	DICHOTOMOUS	CHECKBOX	At what level is LCA content integrated into the study program?
LC08_02	Integration 4: Standalone module, unit, or course	DICHOTOMOUS	CHECKBOX	At what level is LCA content integrated into the study program?
LC08_03	Integration 4: Minor specialization (comprised of multiple modules, units, or courses)	DICHOTOMOUS	CHECKBOX	At what level is LCA content integrated into the study program?
LC08_04	Integration 4: Major specialization (comprised of multiple modules, units, or courses)	DICHOTOMOUS	CHECKBOX	At what level is LCA content integrated into the study program?
LC08_05	Integration 4: Research specialization	DICHOTOMOUS	CHECKBOX	At what level is LCA content integrated into the study program?
LC08_06	Integration 4: Other	DICHOTOMOUS	CHECKBOX	At what level is LCA content integrated into the study program?
LC08_06a	Integration 4: Other (offene Eingabe)	TEXT	OPEN	At what level is LCA content integrated into the study program?
OI01	if LCA taught	NOMINAL	SELECTION	Is LCA taught as a topic at the academic institution where you are currently employed?
OI06	Use not teach lca	NOMINAL	SELECTION	Is LCA being used at your institution by dissertation and/or research students?
OI04	size of institute	NOMINAL	SELECTION	What is the size of your institution?
OI11	Name of institute	NOMINAL	SELECTION	What is the name of your institution, faculty/department/group?
OI11_01	Name of institute: [Keine Beschreibung] 01	TEXT	OPEN	What is the name of your institution, faculty/department/group?
OI10	Location	NOMINAL	SELECTION	Where is your institution located?
OI10s	Location (offene Eingabe)	TEXT	OPEN	Where is your institution located?
OI13_01	Thesis: Bachelor	METRIC	OPEN	In a typical year, how many LCA-related bachelors’, masters’, and/or PhD theses do you supervise?
OI13_02	Thesis: Master	METRIC	OPEN	In a typical year, how many LCA-related bachelors’, masters’, and/or PhD theses do you supervise?
OI13_03	Thesis: PhD	METRIC	OPEN	In a typical year, how many LCA-related bachelors’, masters’, and/or PhD theses do you supervise?
OI16	agreement	NOMINAL	SELECTION
OI18	work status internal	NOMINAL	SELECTION	In what capacity are you affiliated with the institution for which you are going to respond?
OT03_01	Feedback: [01]	TEXT	OPEN	We would love to hear your thoughts on our survey and our research. Please include any feedback which you feel is important or would help us improve.
OT04	Feedback-time	NOMINAL	SELECTION	Is the survey too long?
OT05	Feedback-clear	NOMINAL	SELECTION	Is there any question that is not clear for you?
OT05_01	Feedback-clear: Yes	TEXT	OPEN	Is there any question that is not clear for you?
OT07	Feedback - missing q	NOMINAL	SELECTION	Are there any topics that you feel are not covered by the survey, which would improve our research?
OT07_01	Feedback - missing q: Yes	TEXT	OPEN	Are there any topics that you feel are not covered by the survey, which would improve our research?
OT08	satisfy	NOMINAL	SELECTION	How satisfied were you with the length of the survey?
SI01_01	Program 1: [01]	TEXT	OPEN	What is the name of the study program (e.g. BSc Engineering, MBA Sustainability) on which LCA is being taught?
SI87_01	Program 2: [01]	TEXT	OPEN	What is the name of the study program (e.g. BSc Engineering, MBA Sustainability) on which LCA is being taught?
SI88_01	Program 3: [01]	TEXT	OPEN	What is the name of the study program (e.g. BSc Engineering, MBA Sustainability) on which LCA is being taught?
SI89_01	Program 4: [01]	TEXT	OPEN	What is the name of the study program (e.g. BSc Engineering, MBA Sustainability) on which LCA is being taught?
SI05_01	No. student 1: [01]	METRIC	OPEN	In a typical year, how many students on the study program(s) undertake LCA related content?
SI40_01	No. student 2: [01]	METRIC	OPEN	In a typical year, how many students on the study program(s) undertake LCA related content?
SI41_01	No. student 3: [01]	METRIC	OPEN	In a typical year, how many students on the study program(s) undertake LCA related content?
SI42_01	No. student 4: [01]	METRIC	OPEN	In a typical year, how many students on the study program(s) undertake LCA related content?
SI06_01	No. teacher 1: [01]	METRIC	OPEN	In a typical year, how many people teach LCA related content on the study program(s)?
SI84_01	No. teacher 2: [01]	METRIC	OPEN	In a typical year, how many people teach LCA related content on the study program(s)?
SI85_01	No. teacher 3: [01]	METRIC	OPEN	In a typical year, how many people teach LCA related content on the study program(s)?
SI86_01	No. teacher 4: [01]	METRIC	OPEN	In a typical year, how many people teach LCA related content on the study program(s)?
SI10	other program 1	NOMINAL	SELECTION	Are there further study programs where you teach LCA?
SI74	other program 2	NOMINAL	SELECTION	Are there further study programs where you teach LCA?
SI75	other program 3	NOMINAL	SELECTION	Are there further study programs where you teach LCA?
TI01	time of teach institute	NOMINAL	SELECTION	How long have you been teaching LCA topics at your current institution?
TI02	time of teach personal	NOMINAL	SELECTION	How long have you been teaching LCA topics at any institution?
TI03_01	number of course: [01]	METRIC	OPEN	Considering a typical academic year, as part of how many taught courses (exclusively or in-part) do you teach LCA topics?
TI04	developing	NOMINAL	SELECTION	Considering the LCA topics you teach, are you also responsible for developing the taught content?
TI05	others teach lca	NOMINAL	SELECTION	Are other individuals teaching LCA topics at your institution in addition to you?
TI06_CN	TODO	METRIC	MEASURED	What key references do you recommend to students undertaking LCA courses?
TI06x01	Reference: Textbooks	DICHOTOMOUS	CHECKBOX	What key references do you recommend to students undertaking LCA courses?
TI06x11	Reference: Bauman and Tillman (2004): The Hitch Hiker’s Guide to LCA: An orientation in life cycle assessment methodology and application	DICHOTOMOUS	CHECKBOX	What key references do you recommend to students undertaking LCA courses?
TI06x12	Reference: Curran (2012): Life Cycle Assessment Handbook: A Guide for Environmentally Sustainable Products	DICHOTOMOUS	CHECKBOX	What key references do you recommend to students undertaking LCA courses?
TI06x13	Reference: Finkbeiner (2016): Special Types of Life Cycle Assessment	DICHOTOMOUS	CHECKBOX	What key references do you recommend to students undertaking LCA courses?
TI06x14	Reference: Frischknecht (2020): Lehrbuch der Ökobilanzierung	DICHOTOMOUS	CHECKBOX	What key references do you recommend to students undertaking LCA courses?
TI06x15	Reference: Fullana and Puig (1994): Análisis del ciclo de la vida	DICHOTOMOUS	CHECKBOX	What key references do you recommend to students undertaking LCA courses?
TI06x16	Reference: Grisel and Osset (2004): L’Analyse du Cycle de Vie d’un produit ou d’un service : Applications et mise en pratique	DICHOTOMOUS	CHECKBOX	What key references do you recommend to students undertaking LCA courses?
TI06x17	Reference: Guinée (2002): Handbook on Life Cycle Assessment: Operational Guide to the ISO Standards	DICHOTOMOUS	CHECKBOX	What key references do you recommend to students undertaking LCA courses?
TI06x18	Reference: Hauschild and Huijbregts (2015): Life Cycle Impact Assessment	DICHOTOMOUS	CHECKBOX	What key references do you recommend to students undertaking LCA courses?
TI06x19	Reference: Hauschild et al. (2018): Life Cycle Assessment – Theory and Practice	DICHOTOMOUS	CHECKBOX	What key references do you recommend to students undertaking LCA courses?
TI06x20	Reference: Heijungs and Suh (2002): The Computational Structure of Life Cycle Assessment	DICHOTOMOUS	CHECKBOX	What key references do you recommend to students undertaking LCA courses?
TI06x21	Reference: Jolliet et al. (2015): Environmental Life Cycle Assessment	DICHOTOMOUS	CHECKBOX	What key references do you recommend to students undertaking LCA courses?
TI06x22	Reference: Klöpffer and Grahl (2014): Life Cycle Assessment (LCA): A Guide to Best Practice	DICHOTOMOUS	CHECKBOX	What key references do you recommend to students undertaking LCA courses?
TI06x23	Reference: Schenk and White (2014): Environmental Life Cycle Assessment: Measuring the environmental performance of products	DICHOTOMOUS	CHECKBOX	What key references do you recommend to students undertaking LCA courses?
TI06x02	Reference: Online textbooks	DICHOTOMOUS	CHECKBOX	What key references do you recommend to students undertaking LCA courses?
TI06x211	Reference: Matthews et al. (2020): Life Cycle Assessment – Quantitative Approaches for Decisions That Matter – Free Textbook and Other Learning Resources for the Global LCA Community	DICHOTOMOUS	CHECKBOX	What key references do you recommend to students undertaking LCA courses?
TI06x222	Reference: Sonnemann and Margni (2015): Life Cycle Management	DICHOTOMOUS	CHECKBOX	What key references do you recommend to students undertaking LCA courses?
TI06x03	Reference: Online teaching material	DICHOTOMOUS	CHECKBOX	What key references do you recommend to students undertaking LCA courses?
TI06x31	Reference: ILCA (2020)	DICHOTOMOUS	CHECKBOX	What key references do you recommend to students undertaking LCA courses?
TI06x32	Reference: UNEP (2020b)	DICHOTOMOUS	CHECKBOX	What key references do you recommend to students undertaking LCA courses?
TI06x33	Reference: Uni Freiburg (2020)	DICHOTOMOUS	CHECKBOX	What key references do you recommend to students undertaking LCA courses?
TI06x04	Reference: Standards and guidelines (to support and complement textbooks and other course material)	DICHOTOMOUS	CHECKBOX	What key references do you recommend to students undertaking LCA courses?
TI06x41	Reference: Benoît Norris et al. (2009)—Social LCA (UNEP/SETAC)	DICHOTOMOUS	CHECKBOX	What key references do you recommend to students undertaking LCA courses?
TI06x42	Reference: EC JRC (2010)—ILCD handbook	DICHOTOMOUS	CHECKBOX	What key references do you recommend to students undertaking LCA courses?
TI06x43	Reference: EC JRC (2012)—PEF Guide	DICHOTOMOUS	CHECKBOX	What key references do you recommend to students undertaking LCA courses?
TI06x44	Reference: ISO 14025 (2006)	DICHOTOMOUS	CHECKBOX	What key references do you recommend to students undertaking LCA courses?
TI06x45	Reference: ISO 14040 and ISO 14044 (2006)	DICHOTOMOUS	CHECKBOX	What key references do you recommend to students undertaking LCA courses?
TI06x46	Reference: ISO 14046 (2014)	DICHOTOMOUS	CHECKBOX	What key references do you recommend to students undertaking LCA courses?
TI06x47	Reference: ISO 14067 (2018)	DICHOTOMOUS	CHECKBOX	What key references do you recommend to students undertaking LCA courses?
TI06x48	Reference: Sonnemann and Vigon (2011)—LCA DBs (UNEP/SETAC)	DICHOTOMOUS	CHECKBOX	What key references do you recommend to students undertaking LCA courses?
TI06x49	Reference: Swarr et al. (2011)—LCC (SETAC)	DICHOTOMOUS	CHECKBOX	What key references do you recommend to students undertaking LCA courses?
TI06x50	Reference: Valdivia et al. (2012)—LCSA (UNEP/SETAC)	DICHOTOMOUS	CHECKBOX	What key references do you recommend to students undertaking LCA courses?
TI06x51	Reference: (Benoît Norris et al. 2020)—Guidelines for Social Life Cycle Assessment of Products and Organizations	DICHOTOMOUS	CHECKBOX	What key references do you recommend to students undertaking LCA courses?
TI07_CN	TODO	METRIC	MEASURED	In which primary academic subject areas do you teach LCA content?
TI07x01	Subject area: Architecture, building & planning	DICHOTOMOUS	CHECKBOX	In which primary academic subject areas do you teach LCA content?
TI07x02	Subject area: Biological sciences	DICHOTOMOUS	CHECKBOX	In which primary academic subject areas do you teach LCA content?
TI07x03	Subject area: Business & administrative studies	DICHOTOMOUS	CHECKBOX	In which primary academic subject areas do you teach LCA content?
TI07x04	Subject area: Computer sciences	DICHOTOMOUS	CHECKBOX	In which primary academic subject areas do you teach LCA content?
TI07x05	Subject area: Engineering	DICHOTOMOUS	CHECKBOX	In which primary academic subject areas do you teach LCA content?
TI07x06	Subject area: Aerospace and naval	DICHOTOMOUS	CHECKBOX	In which primary academic subject areas do you teach LCA content?
TI07x07	Subject area: Chemical, process & energy	DICHOTOMOUS	CHECKBOX	In which primary academic subject areas do you teach LCA content?
TI07x08	Subject area: Civil	DICHOTOMOUS	CHECKBOX	In which primary academic subject areas do you teach LCA content?
TI07x09	Subject area: Electronic & electrical	DICHOTOMOUS	CHECKBOX	In which primary academic subject areas do you teach LCA content?
TI07x10	Subject area: Materials	DICHOTOMOUS	CHECKBOX	In which primary academic subject areas do you teach LCA content?
TI07x11	Subject area: Mechanical	DICHOTOMOUS	CHECKBOX	In which primary academic subject areas do you teach LCA content?
TI07x12	Subject area: Production & manufacturing	DICHOTOMOUS	CHECKBOX	In which primary academic subject areas do you teach LCA content?
TI07x13	Subject area: Mathematical sciences	DICHOTOMOUS	CHECKBOX	In which primary academic subject areas do you teach LCA content?
TI07x14	Subject area: Medical sciences	DICHOTOMOUS	CHECKBOX	In which primary academic subject areas do you teach LCA content?
TI07x15	Subject area: Physical sciences	DICHOTOMOUS	CHECKBOX	In which primary academic subject areas do you teach LCA content?
TI07x16	Subject area: Social studies	DICHOTOMOUS	CHECKBOX	In which primary academic subject areas do you teach LCA content?
TI08_01	reference - state: [01]	TEXT	OPEN	reference
TI09	subject area state	NOMINAL	SELECTION
TI09_01	subject area state: Other	TEXT	OPEN
TI10	challenge: Ausweichoption (negativ) oder Anzahl ausgewählter Optionen	METRIC	SYSTEM	What do you consider the biggest challenges in teaching LCA?
TI10_01	challenge: Teaching LCA to an audience with diverse backgrounds	DICHOTOMOUS	CHECKBOX	What do you consider the biggest challenges in teaching LCA?
TI10_02	challenge: Teaching the interdisciplinary nature of LCA to students within a specific discipline	DICHOTOMOUS	CHECKBOX	What do you consider the biggest challenges in teaching LCA?
TI10_03	challenge: Teaching how to integrate LCA with other methods and approaches	DICHOTOMOUS	CHECKBOX	What do you consider the biggest challenges in teaching LCA?
TI10_04	challenge: Having to come up with different application case studies each semester	DICHOTOMOUS	CHECKBOX	What do you consider the biggest challenges in teaching LCA?
TI10_05	challenge: Teaching how to define goal and scope	DICHOTOMOUS	CHECKBOX	What do you consider the biggest challenges in teaching LCA?
TI10_06	challenge: Teaching how to look for bias in LCA studies	DICHOTOMOUS	CHECKBOX	What do you consider the biggest challenges in teaching LCA?
TI10_07	challenge: Teaching the limitations of LCA	DICHOTOMOUS	CHECKBOX	What do you consider the biggest challenges in teaching LCA?
TI10_08	challenge: Teaching how to use and communicate LCA results	DICHOTOMOUS	CHECKBOX	What do you consider the biggest challenges in teaching LCA?
TI10_11	challenge: Explaining and using LCI databases	DICHOTOMOUS	CHECKBOX	What do you consider the biggest challenges in teaching LCA?
TI10_12	challenge: Coaching and supervising students' LCA applications	DICHOTOMOUS	CHECKBOX	What do you consider the biggest challenges in teaching LCA?
TI10_10	challenge: Keeping students motivated despite the complexity and challenges of LCA and balancing expectations	DICHOTOMOUS	CHECKBOX	What do you consider the biggest challenges in teaching LCA?
TI10_09	challenge: Other	DICHOTOMOUS	CHECKBOX	What do you consider the biggest challenges in teaching LCA?
TI10_09a	challenge: Other (offene Eingabe)	TEXT	OPEN	What do you consider the biggest challenges in teaching LCA?
WL01_02	workload 1: Life cycle thinking and LCA context	METRIC	OPEN	Concerning the degree program, please estimate the students‘ workload in hours for the following list of LCA topics.
WL01_03	workload 1: LCA terminology and standards	METRIC	OPEN	Concerning the degree program, please estimate the students‘ workload in hours for the following list of LCA topics.
WL01_04	workload 1: LCI modeling and data	METRIC	OPEN	Concerning the degree program, please estimate the students‘ workload in hours for the following list of LCA topics.
WL01_05	workload 1: LCIA - Environmental Impact Assessment Methods	METRIC	OPEN	Concerning the degree program, please estimate the students‘ workload in hours for the following list of LCA topics.
WL01_06	workload 1: Interpretation incl. sensitivity and uncertainty	METRIC	OPEN	Concerning the degree program, please estimate the students‘ workload in hours for the following list of LCA topics.
WL01_07	workload 1: Advanced LCA methodology (attributional vs. consequential, system expansion, ...)	METRIC	OPEN	Concerning the degree program, please estimate the students‘ workload in hours for the following list of LCA topics.
WL01_08	workload 1: Special types of LCA (CFP, WFP, LCSA, O O-LCA, EEIO EEIO-LCA, ...)	METRIC	OPEN	Concerning the degree program, please estimate the students‘ workload in hours for the following list of LCA topics.
WL01_09	workload 1: Life Cycle Management (use of LCA results for innovation & communication)	METRIC	OPEN	Concerning the degree program, please estimate the students‘ workload in hours for the following list of LCA topics.
WL01_10	workload 1: Case study / project work - interpreting given cases	METRIC	OPEN	Concerning the degree program, please estimate the students‘ workload in hours for the following list of LCA topics.
WL01_11	workload 1: Case study / project work - conducting own case studies	METRIC	OPEN	Concerning the degree program, please estimate the students‘ workload in hours for the following list of LCA topics.
WL01_12	workload 1: Software use - Excel and simplified approaches	METRIC	OPEN	Concerning the degree program, please estimate the students‘ workload in hours for the following list of LCA topics.
WL01_13	workload 1: Software use - Comprehensive LCA software packages	METRIC	OPEN	Concerning the degree program, please estimate the students‘ workload in hours for the following list of LCA topics.
WL01_14	workload 1: Software use - LCI databases	METRIC	OPEN	Concerning the degree program, please estimate the students‘ workload in hours for the following list of LCA topics.
WL01_15	workload 1: Other	TEXT	OPEN	Concerning the degree program, please estimate the students‘ workload in hours for the following list of LCA topics.
WL03_02	workload 2: Life cycle thinking and LCA context	METRIC	OPEN	Concerning the degree program, please estimate the students‘ workload in hours for the following list of LCA topics.
WL03_03	workload 2: LCA terminology and standards	METRIC	OPEN	Concerning the degree program, please estimate the students‘ workload in hours for the following list of LCA topics.
WL03_04	workload 2: LCI modeling and data	METRIC	OPEN	Concerning the degree program, please estimate the students‘ workload in hours for the following list of LCA topics.
WL03_05	workload 2: LCIA - Environmental Impact Assessment Methods	METRIC	OPEN	Concerning the degree program, please estimate the students‘ workload in hours for the following list of LCA topics.
WL03_06	workload 2: Interpretation incl. sensitivity and uncertainty	METRIC	OPEN	Concerning the degree program, please estimate the students‘ workload in hours for the following list of LCA topics.
WL03_07	workload 2: Advanced LCA methodology (attributional vs. consequential, system expansion, ...)	METRIC	OPEN	Concerning the degree program, please estimate the students‘ workload in hours for the following list of LCA topics.
WL03_08	workload 2: Special types of LCA (CFP, WFP, LCSA, O O-LCA, EEIO EEIO-LCA, ...)	METRIC	OPEN	Concerning the degree program, please estimate the students‘ workload in hours for the following list of LCA topics.
WL03_09	workload 2: Life Cycle Management (use of LCA results for innovation & communication)	METRIC	OPEN	Concerning the degree program, please estimate the students‘ workload in hours for the following list of LCA topics.
WL03_10	workload 2: Case study / project work - interpreting given cases	METRIC	OPEN	Concerning the degree program, please estimate the students‘ workload in hours for the following list of LCA topics.
WL03_11	workload 2: Case study / project work - conducting own case studies	METRIC	OPEN	Concerning the degree program, please estimate the students‘ workload in hours for the following list of LCA topics.
WL03_12	workload 2: Software use - Excel and simplified approaches	METRIC	OPEN	Concerning the degree program, please estimate the students‘ workload in hours for the following list of LCA topics.
WL03_13	workload 2: Software use - Comprehensive LCA software packages	METRIC	OPEN	Concerning the degree program, please estimate the students‘ workload in hours for the following list of LCA topics.
WL03_14	workload 2: Software use - LCI databases	METRIC	OPEN	Concerning the degree program, please estimate the students‘ workload in hours for the following list of LCA topics.
WL03_15	workload 2: Other	TEXT	OPEN	Concerning the degree program, please estimate the students‘ workload in hours for the following list of LCA topics.
WL04_02	workload 3: Life cycle thinking and LCA context	METRIC	OPEN	Concerning the degree program, please estimate the students‘ workload in hours for the following list of LCA topics.
WL04_03	workload 3: LCA terminology and standards	METRIC	OPEN	Concerning the degree program, please estimate the students‘ workload in hours for the following list of LCA topics.
WL04_04	workload 3: LCI modeling and data	METRIC	OPEN	Concerning the degree program, please estimate the students‘ workload in hours for the following list of LCA topics.
WL04_05	workload 3: LCIA - Environmental Impact Assessment Methods	METRIC	OPEN	Concerning the degree program, please estimate the students‘ workload in hours for the following list of LCA topics.
WL04_06	workload 3: Interpretation incl. sensitivity and uncertainty	METRIC	OPEN	Concerning the degree program, please estimate the students‘ workload in hours for the following list of LCA topics.
WL04_07	workload 3: Advanced LCA methodology (attributional vs. consequential, system expansion, ...)	METRIC	OPEN	Concerning the degree program, please estimate the students‘ workload in hours for the following list of LCA topics.
WL04_08	workload 3: Special types of LCA (CFP, WFP, LCSA, O O-LCA, EEIO EEIO-LCA, ...)	METRIC	OPEN	Concerning the degree program, please estimate the students‘ workload in hours for the following list of LCA topics.
WL04_09	workload 3: Life Cycle Management (use of LCA results for innovation & communication)	METRIC	OPEN	Concerning the degree program, please estimate the students‘ workload in hours for the following list of LCA topics.
WL04_10	workload 3: Case study / project work - interpreting given cases	METRIC	OPEN	Concerning the degree program, please estimate the students‘ workload in hours for the following list of LCA topics.
WL04_11	workload 3: Case study / project work - conducting own case studies	METRIC	OPEN	Concerning the degree program, please estimate the students‘ workload in hours for the following list of LCA topics.
WL04_12	workload 3: Software use - Excel and simplified approaches	METRIC	OPEN	Concerning the degree program, please estimate the students‘ workload in hours for the following list of LCA topics.
WL04_13	workload 3: Software use - Comprehensive LCA software packages	METRIC	OPEN	Concerning the degree program, please estimate the students‘ workload in hours for the following list of LCA topics.
WL04_14	workload 3: Software use - LCI databases	METRIC	OPEN	Concerning the degree program, please estimate the students‘ workload in hours for the following list of LCA topics.
WL04_15	workload 3: Other	TEXT	OPEN	Concerning the degree program, please estimate the students‘ workload in hours for the following list of LCA topics.
WL05_02	workload 4: Life cycle thinking and LCA context	METRIC	OPEN	Concerning the degree program, please estimate the students‘ workload in hours for the following list of LCA topics.
WL05_03	workload 4: LCA terminology and standards	METRIC	OPEN	Concerning the degree program, please estimate the students‘ workload in hours for the following list of LCA topics.
WL05_04	workload 4: LCI modeling and data	METRIC	OPEN	Concerning the degree program, please estimate the students‘ workload in hours for the following list of LCA topics.
WL05_05	workload 4: LCIA - Environmental Impact Assessment Methods	METRIC	OPEN	Concerning the degree program, please estimate the students‘ workload in hours for the following list of LCA topics.
WL05_06	workload 4: Interpretation incl. sensitivity and uncertainty	METRIC	OPEN	Concerning the degree program, please estimate the students‘ workload in hours for the following list of LCA topics.
WL05_07	workload 4: Advanced LCA methodology (attributional vs. consequential, system expansion, ...)	METRIC	OPEN	Concerning the degree program, please estimate the students‘ workload in hours for the following list of LCA topics.
WL05_08	workload 4: Special types of LCA (CFP, WFP, LCSA, O O-LCA, EEIO EEIO-LCA, ...)	METRIC	OPEN	Concerning the degree program, please estimate the students‘ workload in hours for the following list of LCA topics.
WL05_09	workload 4: Life Cycle Management (use of LCA results for innovation & communication)	METRIC	OPEN	Concerning the degree program, please estimate the students‘ workload in hours for the following list of LCA topics.
WL05_10	workload 4: Case study / project work - interpreting given cases	METRIC	OPEN	Concerning the degree program, please estimate the students‘ workload in hours for the following list of LCA topics.
WL05_11	workload 4: Case study / project work - conducting own case studies	METRIC	OPEN	Concerning the degree program, please estimate the students‘ workload in hours for the following list of LCA topics.
WL05_12	workload 4: Software use - Excel and simplified approaches	METRIC	OPEN	Concerning the degree program, please estimate the students‘ workload in hours for the following list of LCA topics.
WL05_13	workload 4: Software use - Comprehensive LCA software packages	METRIC	OPEN	Concerning the degree program, please estimate the students‘ workload in hours for the following list of LCA topics.
WL05_14	workload 4: Software use - LCI databases	METRIC	OPEN	Concerning the degree program, please estimate the students‘ workload in hours for the following list of LCA topics.
WL05_15	workload 4: Other	TEXT	OPEN	Concerning the degree program, please estimate the students‘ workload in hours for the following list of LCA topics.
WL02_01	Total 1: Total LCA workload within the whole study program	METRIC	OPEN	Concerning the study program, please estimate the students‘ workload in hours for the following list of LCA topics.
WL02_02	Total 1: ONLY if you don’t know the total LCA workload of the study program, please indicate the total LCA workload of your course here.	TEXT	OPEN	Concerning the study program, please estimate the students‘ workload in hours for the following list of LCA topics.
WL06_01	Total 2: Total LCA workload within the whole study program	METRIC	OPEN	Concerning the study program, please estimate the students‘ workload in hours for the following list of LCA topics.
WL07_01	Total 3: Total LCA workload within the whole study program	METRIC	OPEN	Concerning the study program, please estimate the students‘ workload in hours for the following list of LCA topics.
WL08_01	Total 4: Total LCA workload within the whole study program	METRIC	OPEN	Concerning the study program, please estimate the students‘ workload in hours for the following list of LCA topics.
S_IP	IP-Adresse des Befragten	TEXT	SYSTEM
S_LANG	Spracheinstellung im Browser des Befragten	TEXT	SYSTEM
S_REFERR	Referer (Webseite auf welcher der Link zum Fragebogen angeklickt wurde)	TEXT	SYSTEM
S_BROWSR	Browser, welcher im Interview verwendet wurde	TEXT	SYSTEM
FINISHED	Wurde die Befragung abgeschlossen (letzte Seite erreicht)?	BOOL	SYSTEM
Q_VIEWER	Hat der Teilnehmer den Fragebogen nur angesehen, ohne die Pflichtfragen zu beantworten?	BOOL	SYSTEM
LASTPAGE	Seite, die der Teilnehmer zuletzt bearbeitet hat	METRIC	SYSTEM
MAXPAGE	Letzte Seite, die im Fragebogen bearbeitet wurde	METRIC	SYSTEM
MISSING	Anteil fehlender Antworten in Prozent	METRIC	SYSTEM
MISSREL	Anteil fehlender Antworten (gewichtet nach Relevanz)	METRIC	SYSTEM
TIME_RSI	Maluspunkte für schnelles Ausfüllen	METRIC	SYSTEM
DEG_TIME	Maluspunkte für schnelles Ausfüllen	METRIC	SYSTEM
